# Supplementary material for: Divergent viral presentation among human tumors and adjacent normal tissues
Source: PubMed Central journal article supplement (PMC4919655; doi:10.1038/srep28294), 2016-06-24
Supplement: srep28294-s1.pdf [file srep28294-s1.pdf]

Supplementary materials for “**Divergent viral presentation among human tumors and adjacent normal tissues**”

Song Cao<sup>1</sup>, Michael C. Wendl<sup>1,3,5</sup>, Matthew A. Wyczalkowski<sup>1</sup>, Kristine Wylie<sup>1,6</sup>, Kai Ye<sup>1,3</sup>, Reyka Jayasinghe<sup>1,2</sup>, Mingchao Xie<sup>1,2</sup>, Song Wu<sup>1</sup>, Beifang Niu<sup>1</sup>, Robert Grubb III<sup>7</sup>, Kimberly J. Johnson<sup>8</sup>, Hiram Gay<sup>4</sup>, Ken Chen<sup>9</sup>, Janet S. Rader<sup>10</sup>, John F. Dipersio<sup>2,4</sup>, Feng Chen<sup>2,4</sup>, and Li Ding<sup>1,2,3,4#</sup>

McDonnell Genome Institute<sup>1</sup>, Department of Medicine<sup>2</sup>, Department of Genetics<sup>3</sup>, Siteman Cancer Center<sup>4</sup>, Department of Mathematics<sup>5</sup>, Department of Pediatrics<sup>6</sup>, Department of Surgery<sup>7</sup>, Washington University, St. Louis, Missouri 63108, USA

<sup>8</sup>Brown School Master of Public Health Program, Washington University in St. Louis, St. Louis, MO 63130, USA

<sup>9</sup>The University of Texas MD Anderson Cancer Center, Department of Bioinformatics and Computational Biology, Houston, Texas 77030, USA

<sup>10</sup>Department of Obstetrics and Gynecology, Medical College of Wisconsin, Milwaukee, WI 53226, USA

# Corresponding Author:

Li Ding, Ph.D

McDonnell Genome Institute

Division of Oncology, Department of Medicine

Washington University School of Medicine

St. Louis, MO 63108

Email: [lding@genome.wustl.edu](mailto:lding@genome.wustl.edu)

## Virus discovery of CESC and other cancer types

The vast majority of CESC samples are HPV-positive (~92%) having RPHM $\geq$ 100, with 16 different subtypes observed. HPV16 represents 57.6% of HPV positive cases, followed by HPV18 and HPV45, with 12.7% and 7.1%, respectively. HPV31, HPV33, HPV35, HPV39, and HPV52 are 2.4%, 2.4%, 1.6%, 1.6% and 2.4%, respectively (Fig. 1A). High HPV prevalence in CESC is consistent with a meta-study using a PCR-based HPV assay<sup>1</sup> and RNA-Seq data<sup>2,3</sup>. However, using a complete nucleotide reference database, we were able to further detect several rare HPV subtypes, such as HPV26 and HPV30, which were not reported previously<sup>1,2,4,5</sup> (Fig. 1A).

Our analysis shows a small fraction of virus-positive samples in other cancer types such as pancreatic adenocarcinoma (PAAD), kidney renal clear cell carcinoma (KIRC), bladder urothelial carcinoma (BLCA), uterine carcinosarcoma (UCS), lung squamous cell carcinoma (LUSC), sarcoma (SARC), skin cutaneous melanoma (SKCM) and brain lower grade glioma (LGG) (Fig. 1A). For instance, in BLCA, we found one sample with BK virus, two samples with HPV16, five with HPV11, HPV45, HPV52, HPV56 or HPV6 and four with HHV5, largely consistent with a previous TCGA report<sup>6</sup>. Levels for BK, HPV16, HPV52, and HPV6 are very high (RPHM $>10^4$ ) (Fig. S3C). We found three LGG samples with HPV16 and one sample with HPV58. The RPHMs of HPV16 are between  $10^2$  and  $10^3$  (Fig. S3D and S9) and E6 and E7 are expressed at higher levels than other viral genes in LGG. In addition, we identified one LUSC and one SKCM with a very high abundance of HHV4 (Fig. 1A and Fig. S3B). The findings of HPV16 on LGG and HHV4 on LUSC and SKCM indicate that HPV16 and HHV4 may play important role in other cancer types.

## Reference:

1. Tang KW, Alaei-Mahabadi B, Samuelsson T, Lindh M, & Larsson E (2013) The landscape of viral expression and host gene fusion and adaptation in human cancer. *Nat Commun* 4:2513.
2. Khoury JD, *et al.* (2013) Landscape of DNA virus associations across human malignant cancers: analysis of 3,775 cases using RNA-Seq. *J Virol* 87(16):8916-8926.
3. Clifford G, Franceschi S, Diaz M, Munoz N, & Villa LL (2006) HPV type-distribution in women with and without cervical neoplastic diseases. *Vaccine* 24:26-34.
4. Ojesina AI, *et al.* (2014) Landscape of genomic alterations in cervical carcinomas. *Nature* 506(7488):371-375.
5. Geraets D, *et al.* (2012) Detection of rare and possibly carcinogenic human papillomavirus genotypes as single infections in invasive cervical cancer. *J Pathol* 228(4):534-543.
6. Anonymous (2014) Comprehensive molecular characterization of urothelial bladder carcinoma. *Nature* 507(7492):315-322.

## Supplementary figures

**Supplementary Figure 1 (Page 6):** The schematics of VirusScan pipeline.

**Supplementary Figure 2 (Page 7):** The histogram of HPV's RPHM among all tumor samples.

**Supplementary Figure 3 (Pages 8-11):** The abundance (RPHM) of viruses detected in (a) gastrointestinal cancers, (b) gynecologic and head and neck cancers, (c) bladder and kidney cancers and (d) other cancer types. We use different colors to illustrate the virus abundance in log<sub>10</sub> scale. In the figure, we only show viruses with RPHM $\geq$ 100.

**Supplementary Figure 4 (Page 12):** RNA-Seq read counts for HHVs across gastrointestinal cancers.

**Supplementary Figure 5 (Page 13):** Read depths for HHV4 in samples with RPHM $\geq$ 100 across whole virus genome.

**Supplementary Figure 6 (Page 14):** Read depths for HHV5 in samples with RPHM $\geq$ 100 across the whole virus genome.

**Supplementary Figure 7 (Pages 15-16):** Read depths for (a) HHV1 and (b) HHV6 in samples with RPHM $\geq$ 100 across the whole virus genome.

**Supplementary Figure 8 (Pages 17-18):** Unsupervised clustering of samples based on the gene expression of (a) HPV16 and (b) HPV18.

**Supplementary Figure 9 (Page 19):** Read depths for HPV16 in the entire virus genome across three LGG samples.

**Supplementary Figure 10 (Page 20):** Comparison of *MYC* expression for samples with HPV integrations on *CASC8* and *PVT1* and samples without these integration sites.

**Supplementary Figure 11 (Pages 21-22):** The RPKM's difference between the case and the mean value of controls for different exons in the longest transcripts of (a) genes *CTSE*, *GRHL2*, *CD274* and *RAD51B* and (b) genes *RNF166*, *ABR*, *PGAP3* and *IKZF3* with recurrent virus integrations. We use the circle's size to quantify the  $-\log(P)$ , which  $P$  is the p-value of the case significant from the controls. Different samples are marked by different colors.

**Supplementary Figure 12 (Page 23):** (a) The number of virus variants and (b) the mutation rate for these viruses across different samples.

**Supplementary Figure 13 (Page 24):** The frequency of HPV16 variants across HNSC (Gray) and CESC (Blue) samples.

**Supplementary Figure 14 (Page 25):** Unsupervised clustering of samples based on HPV16 variants in (a) HNSC and (b) CESC. All the selected variant sites have a coverage higher than 10 across all samples.



**Supplementary Tables:**

**Supplementary Table 1 (Pages 26-27):** The abbreviations of cancer types, viruses and human and viral gene names.

**Supplementary Table 2 (Pages 28-34):** The location of common integration sites found in CESC, HNSC and LIHC.

Fig. S1

## VirusScan Pipeline

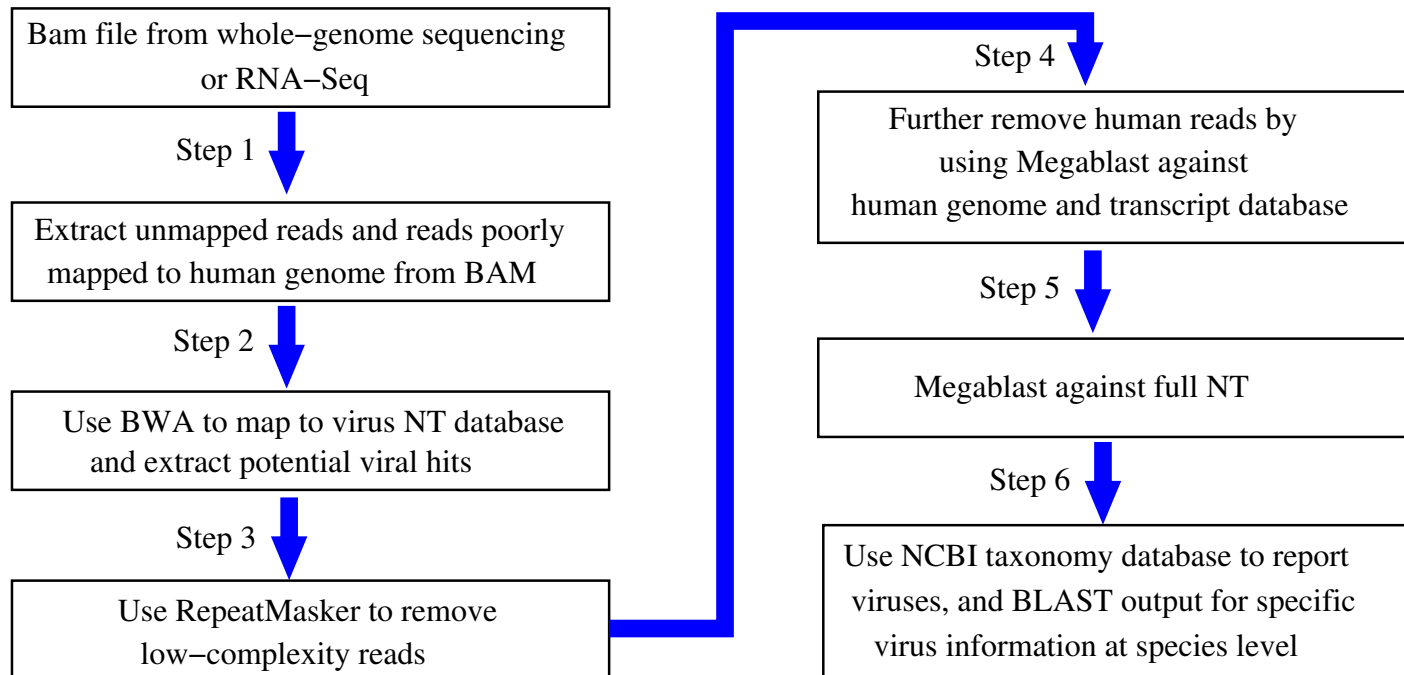

Fig. S2: Histogram of RPHM

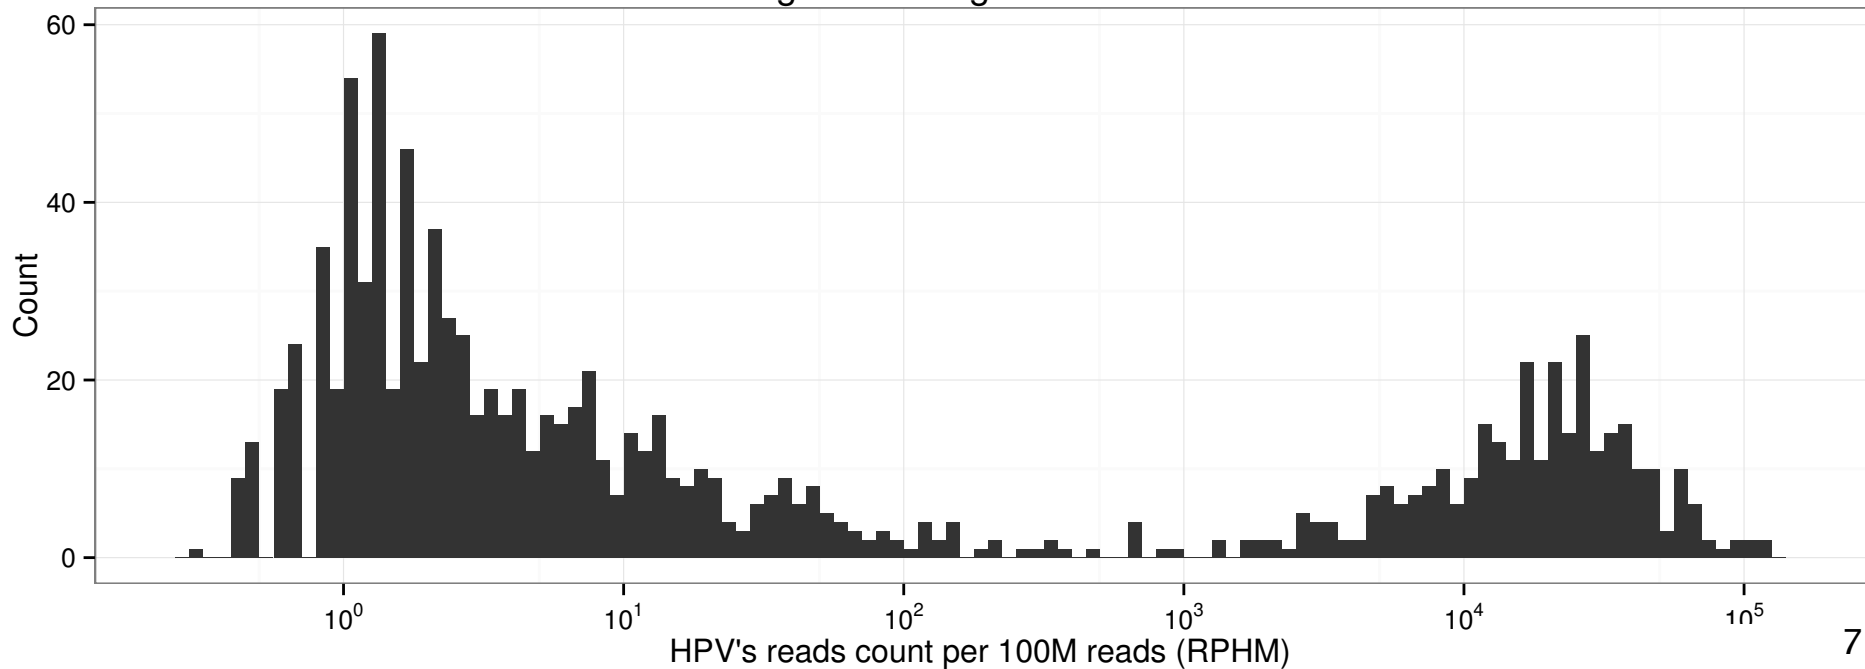



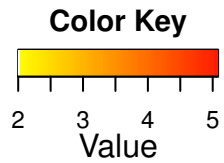

Fig. S3b

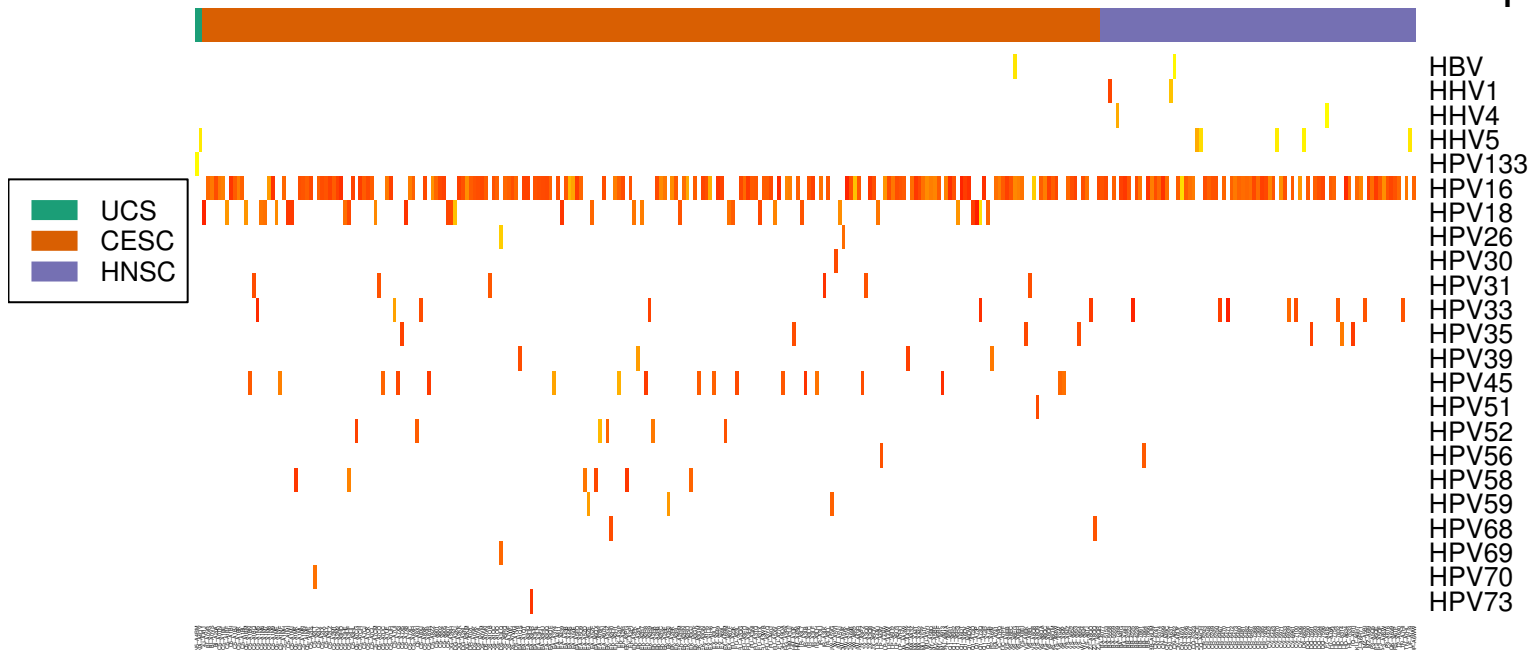

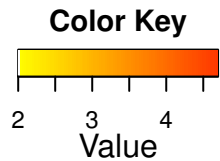

Fig. S3c

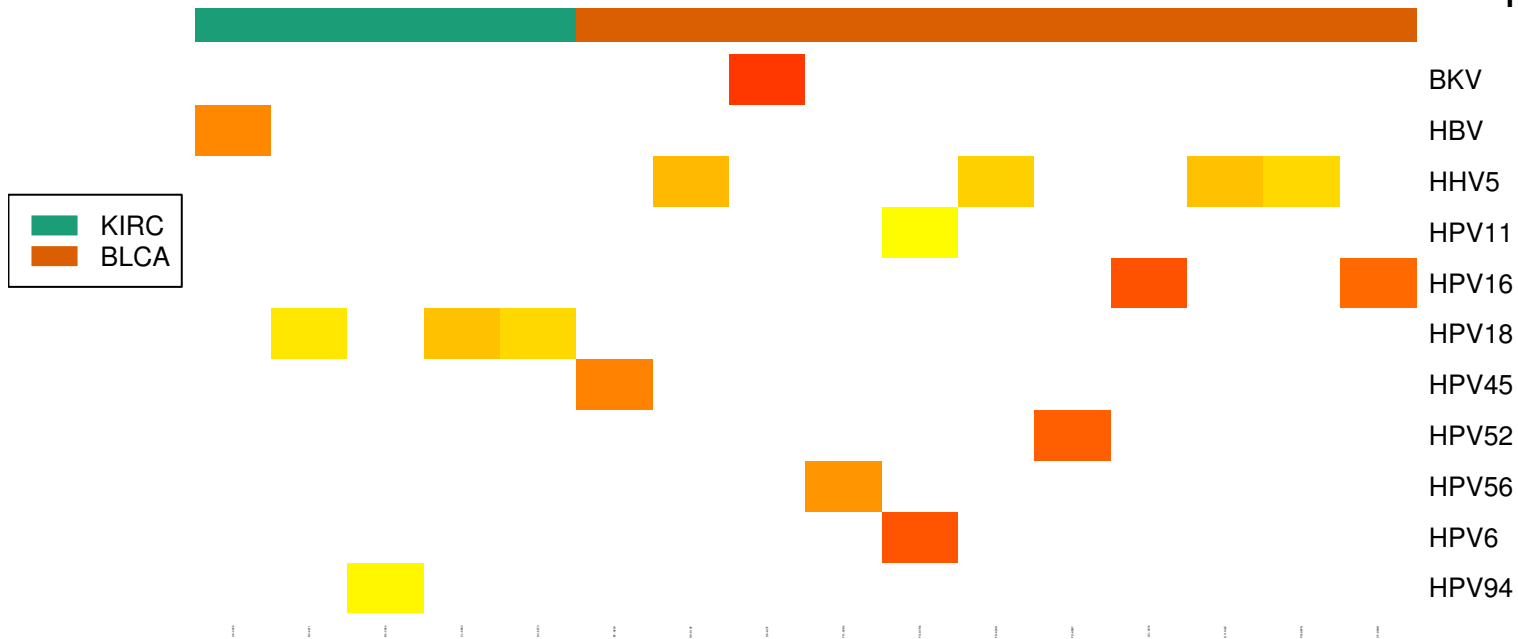



Fig. S4: Histogram of HHVs RNA-Seq Read Counts

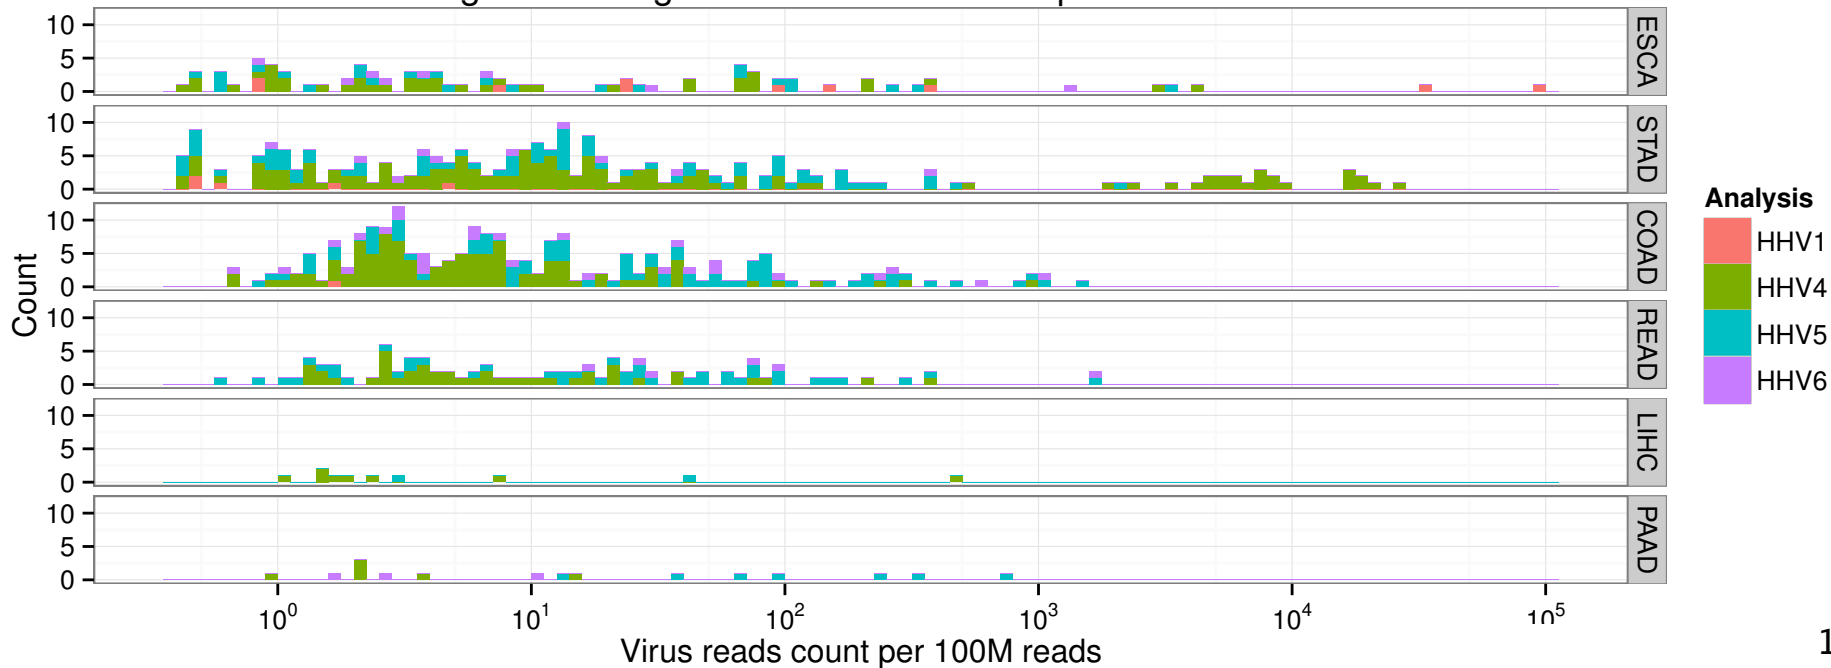



Fig. S5

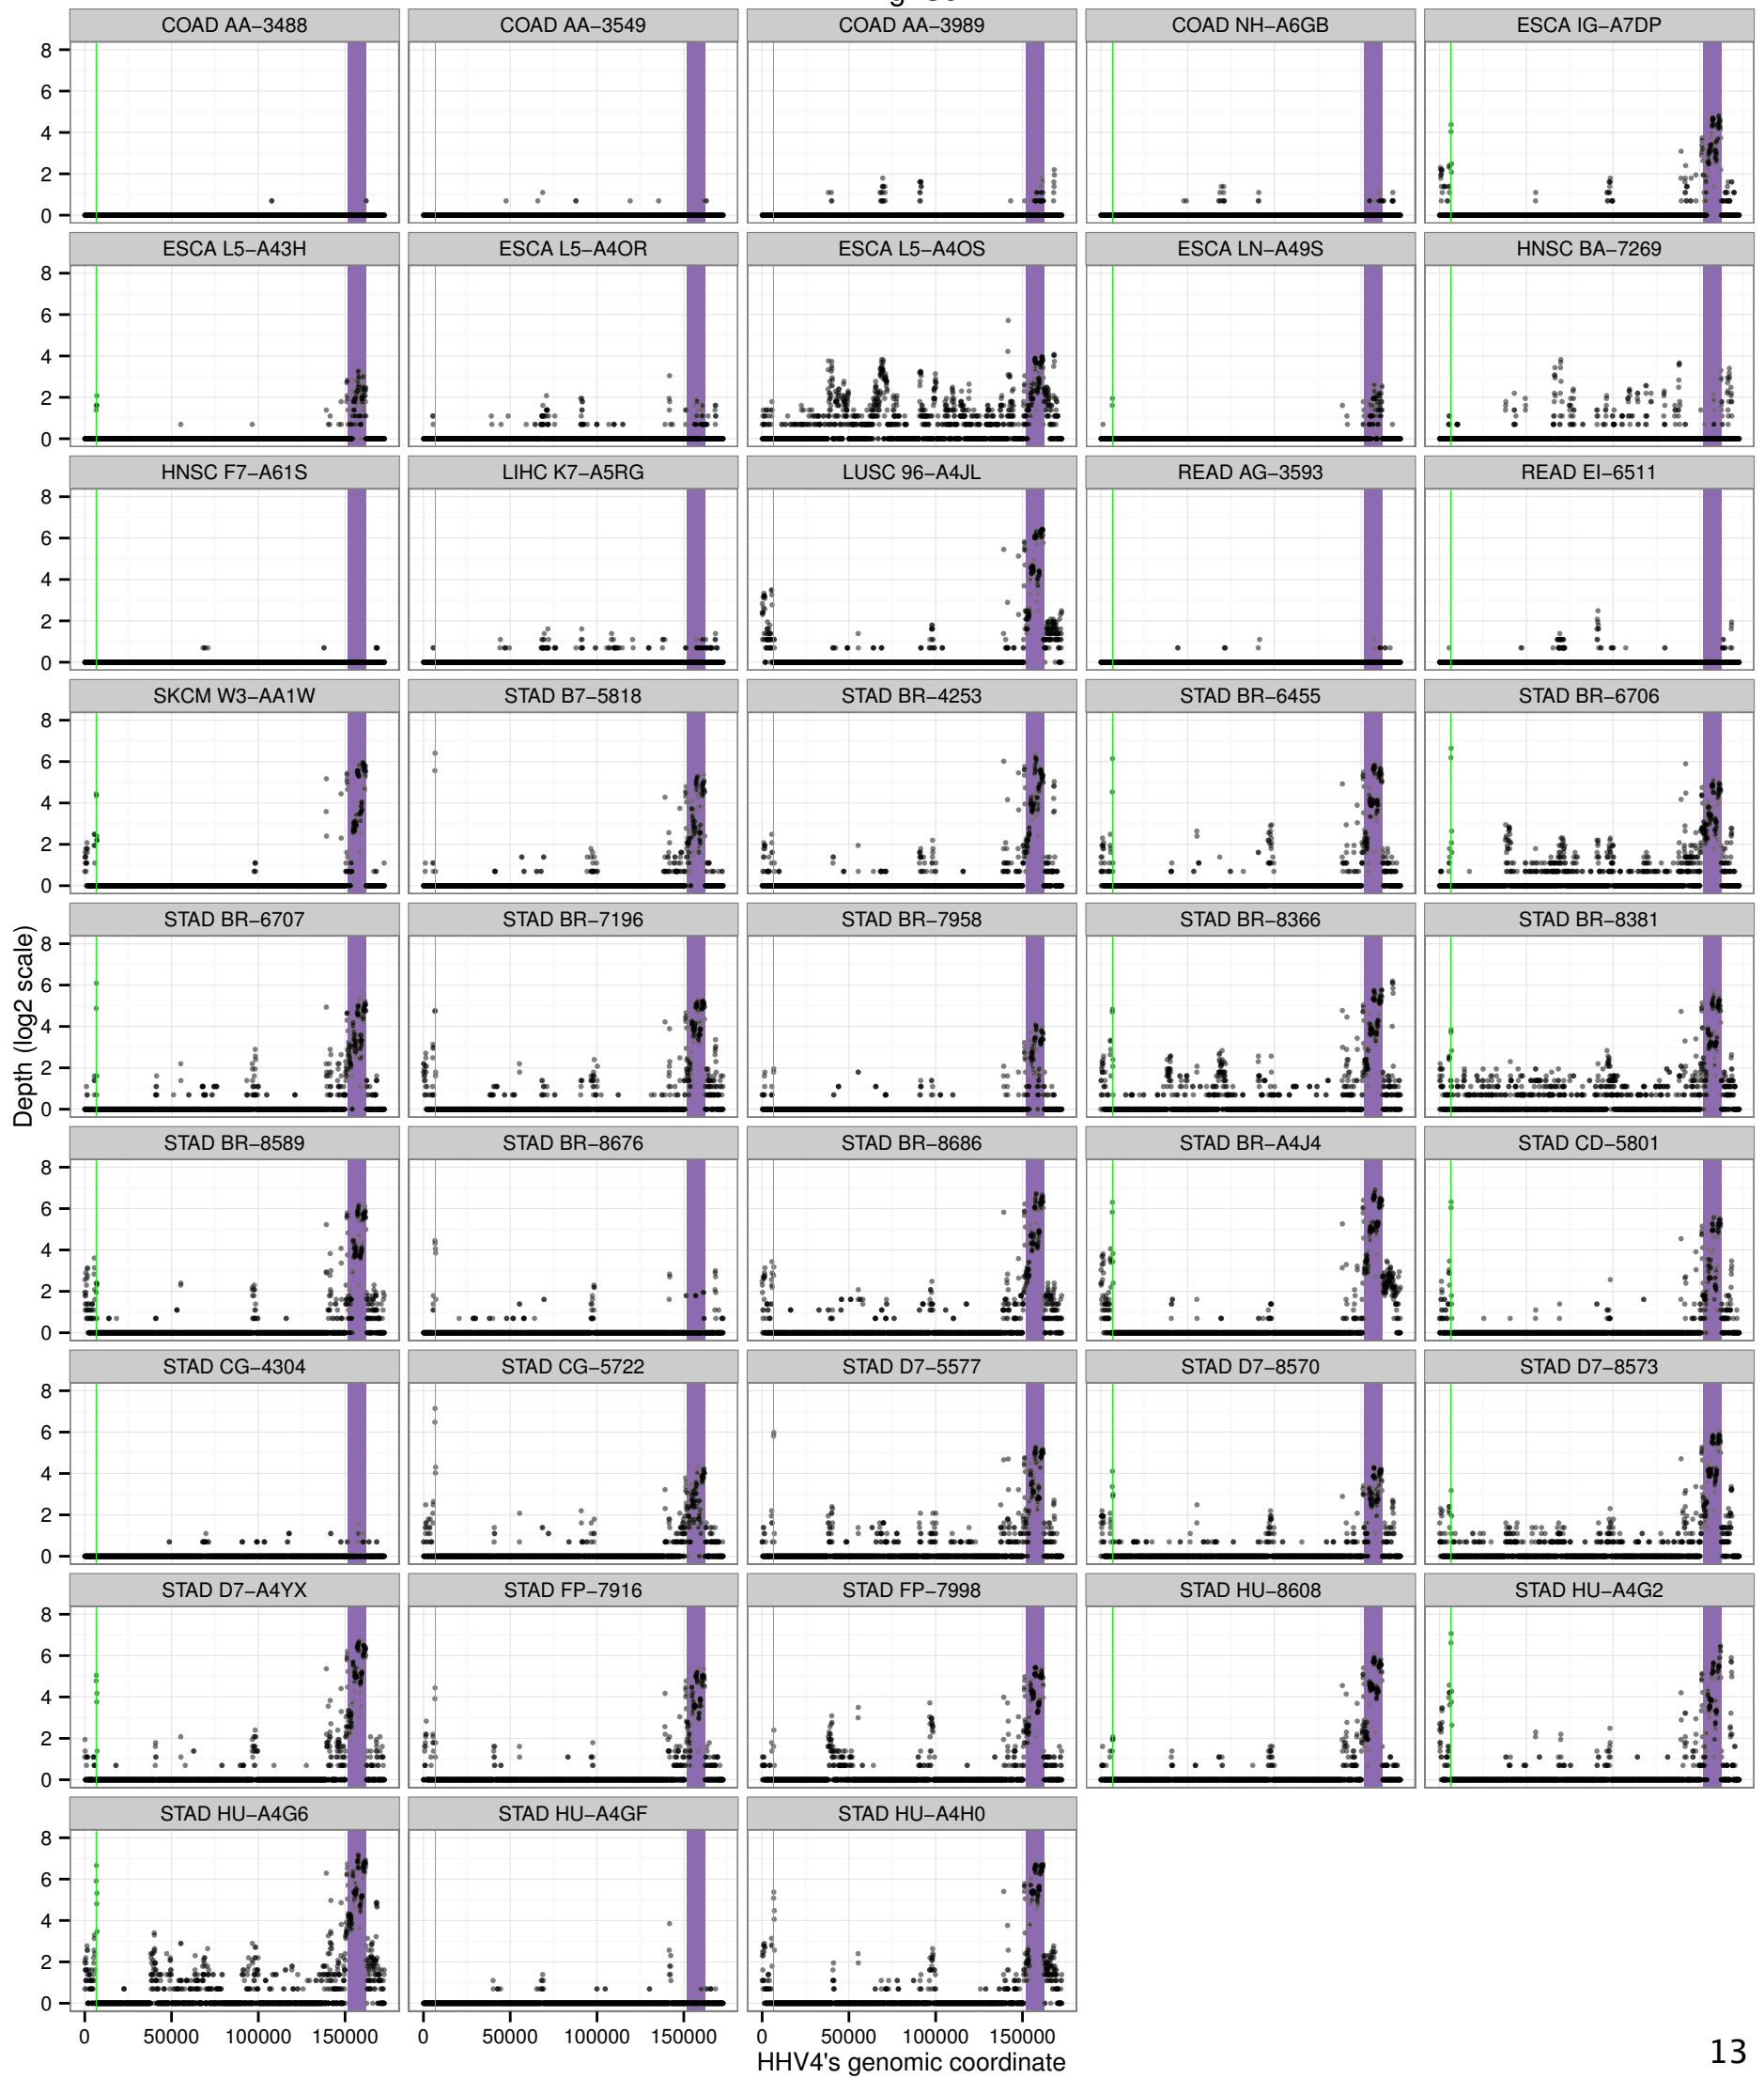

Fig. S6

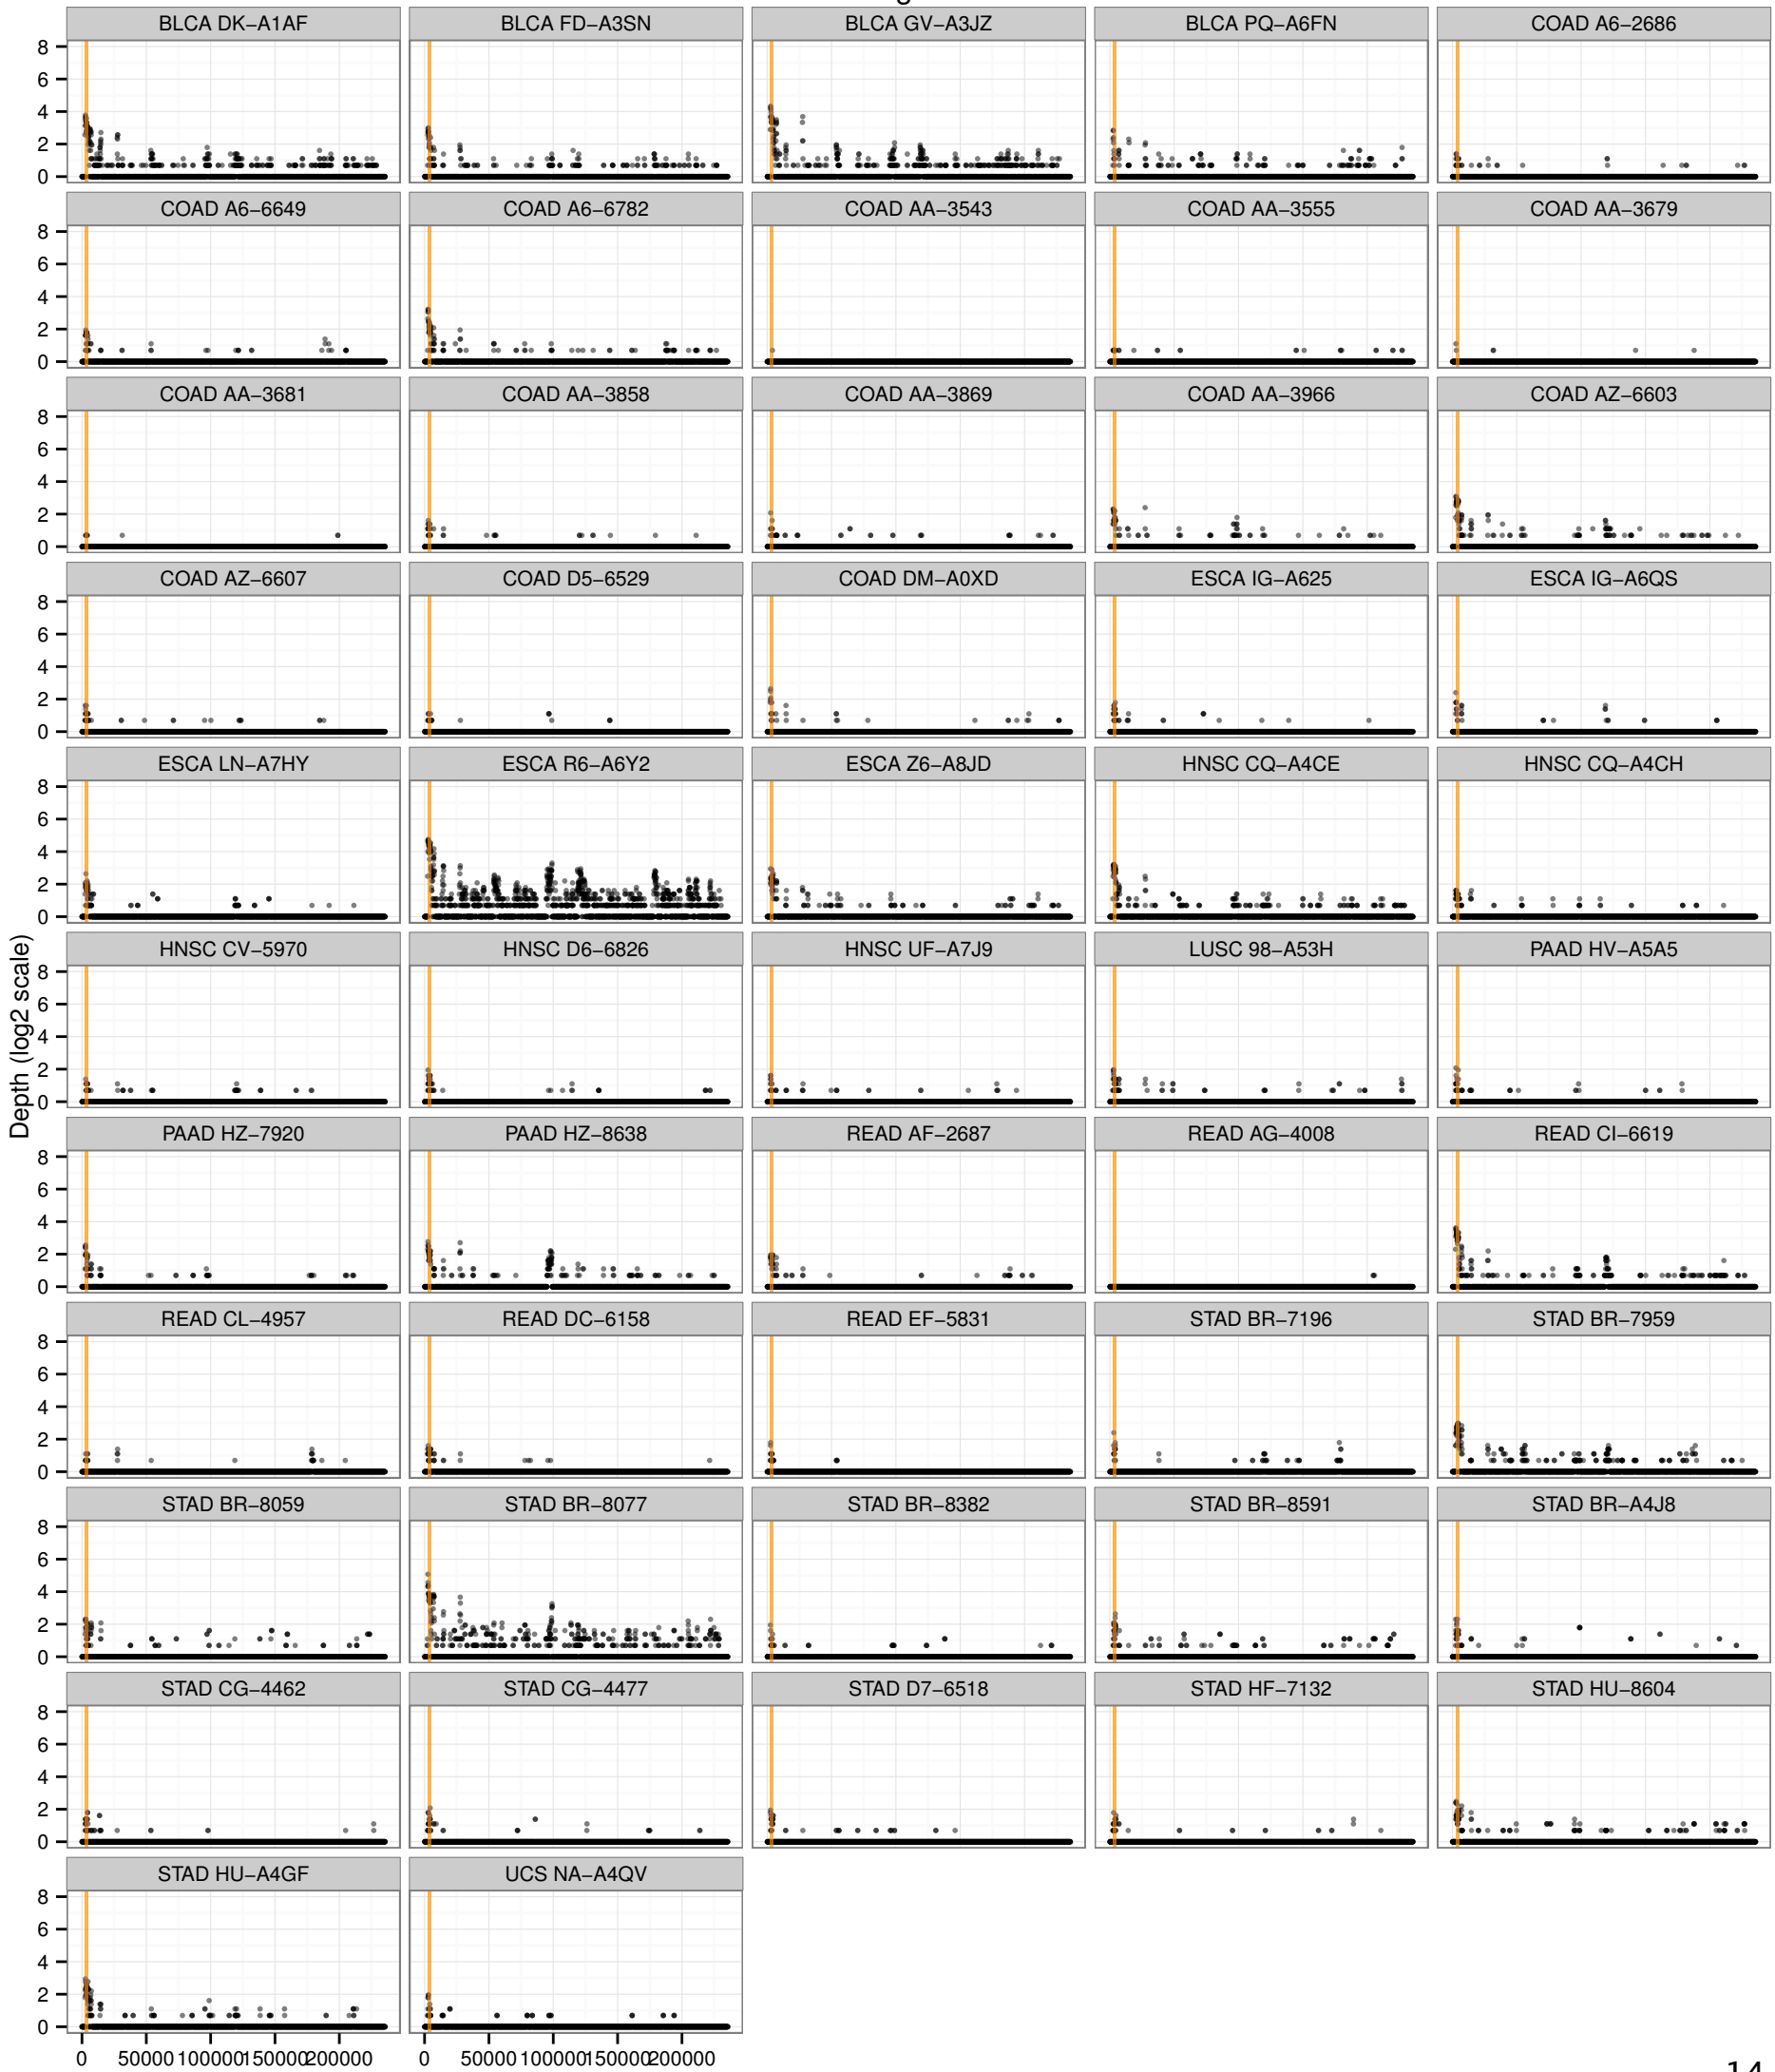

Fig. S7a

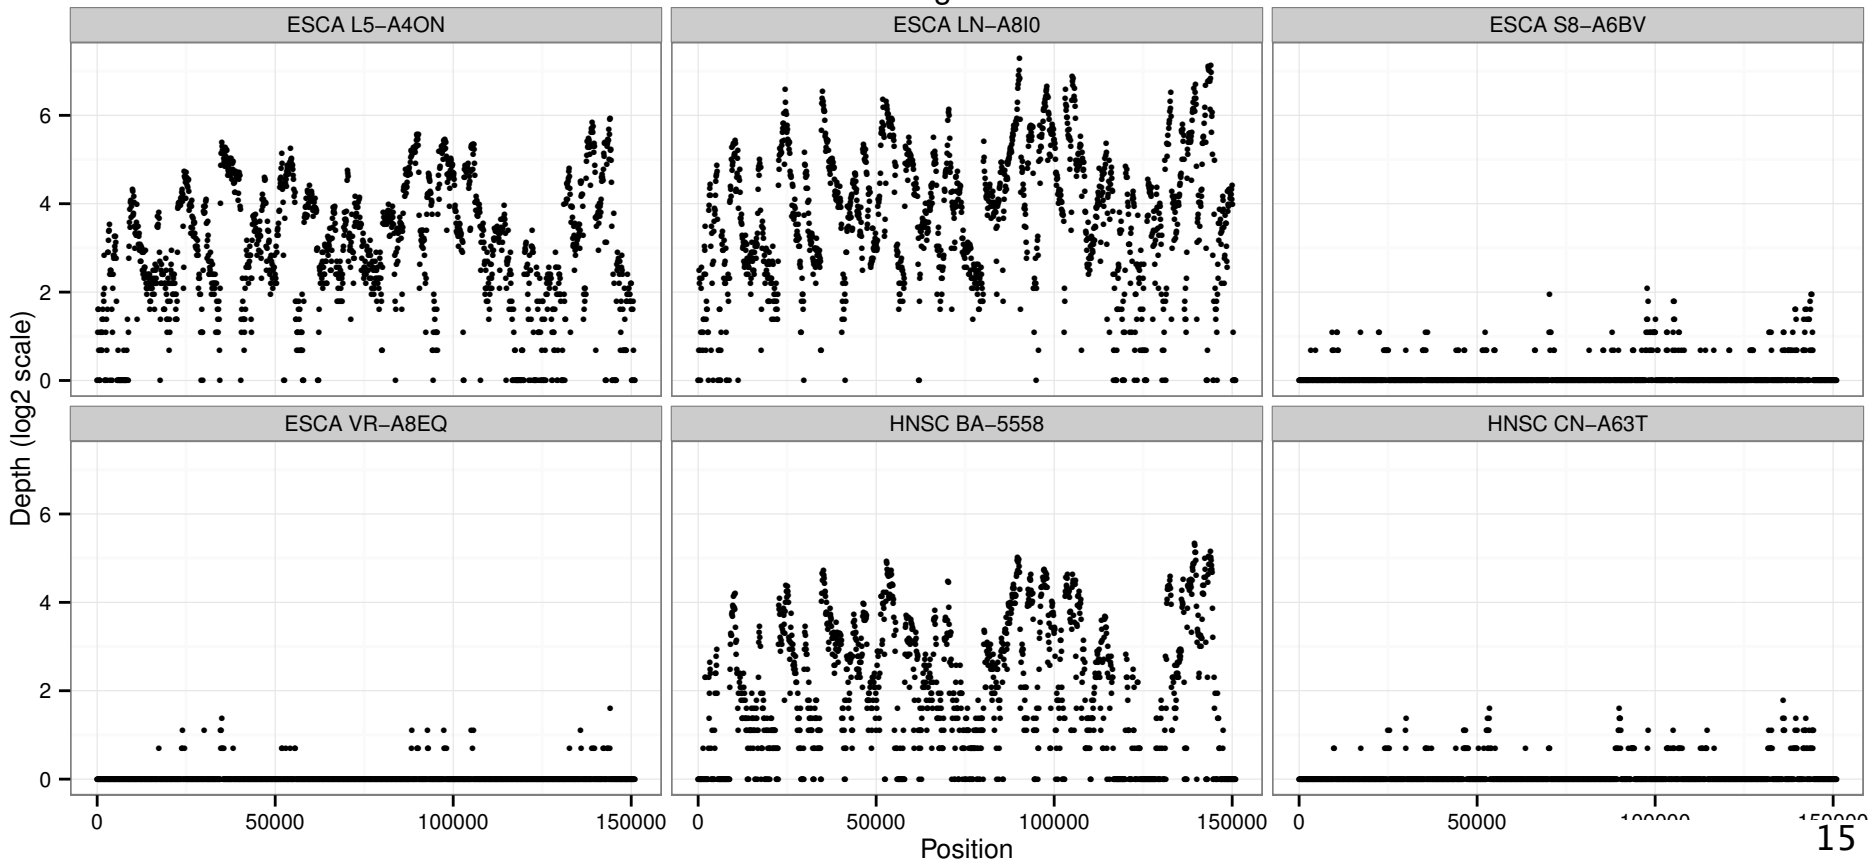

Fig. S7b

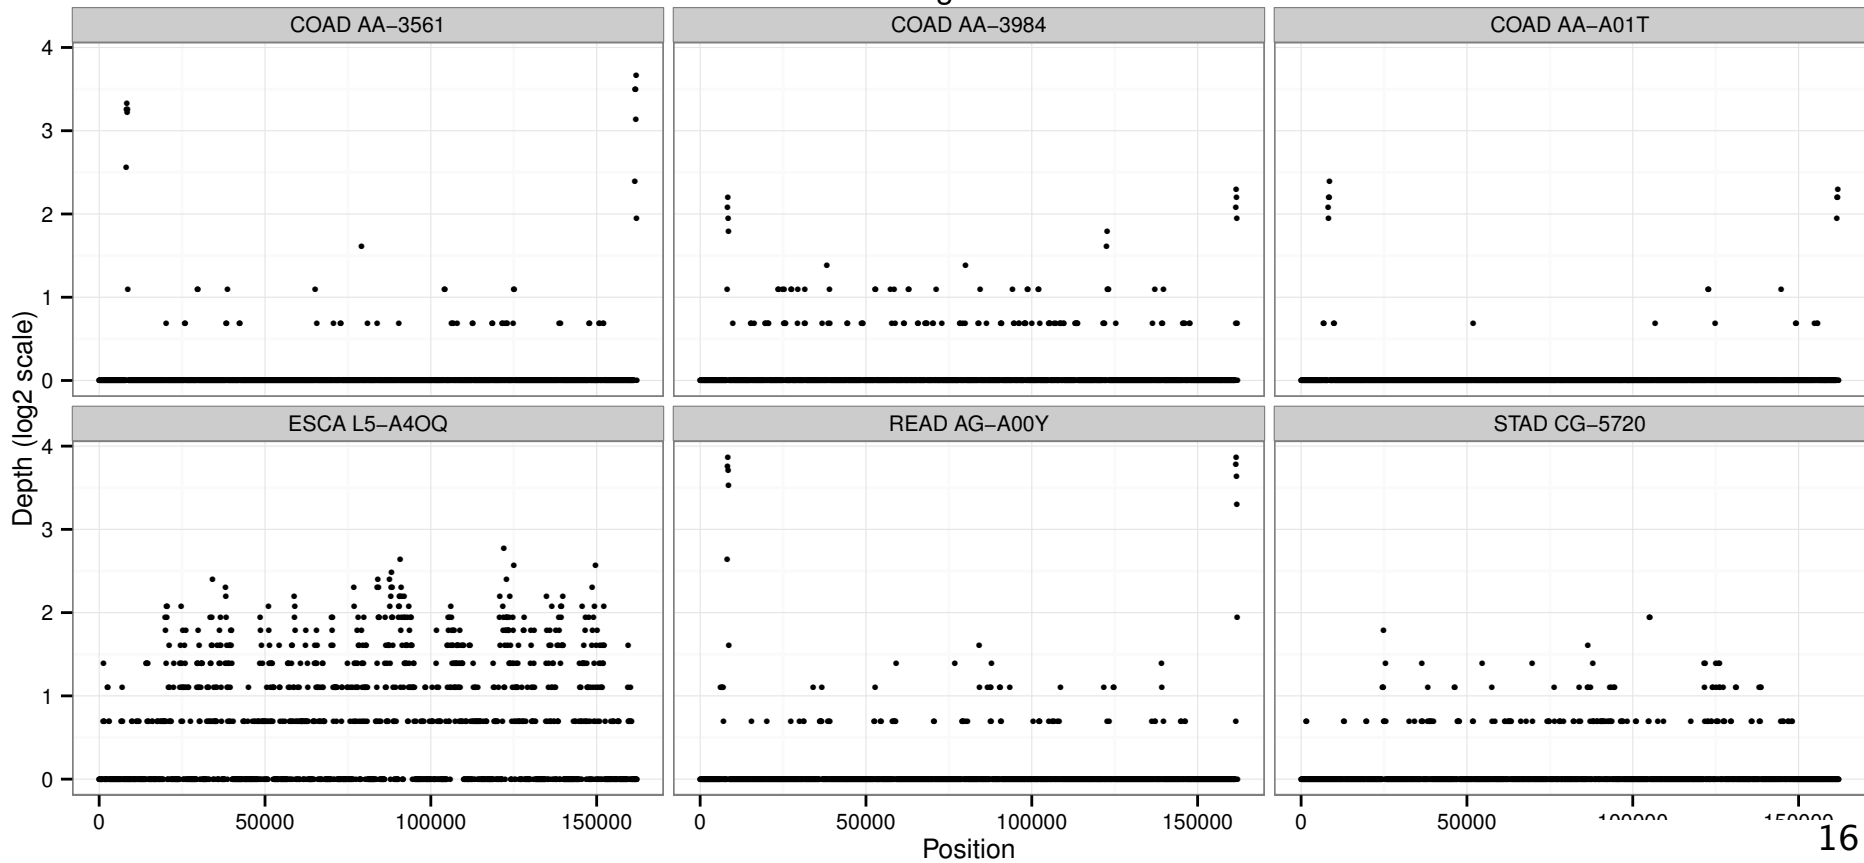





Fig. S9: LGG Samples with HPV16's RPHM  $\geq 100$

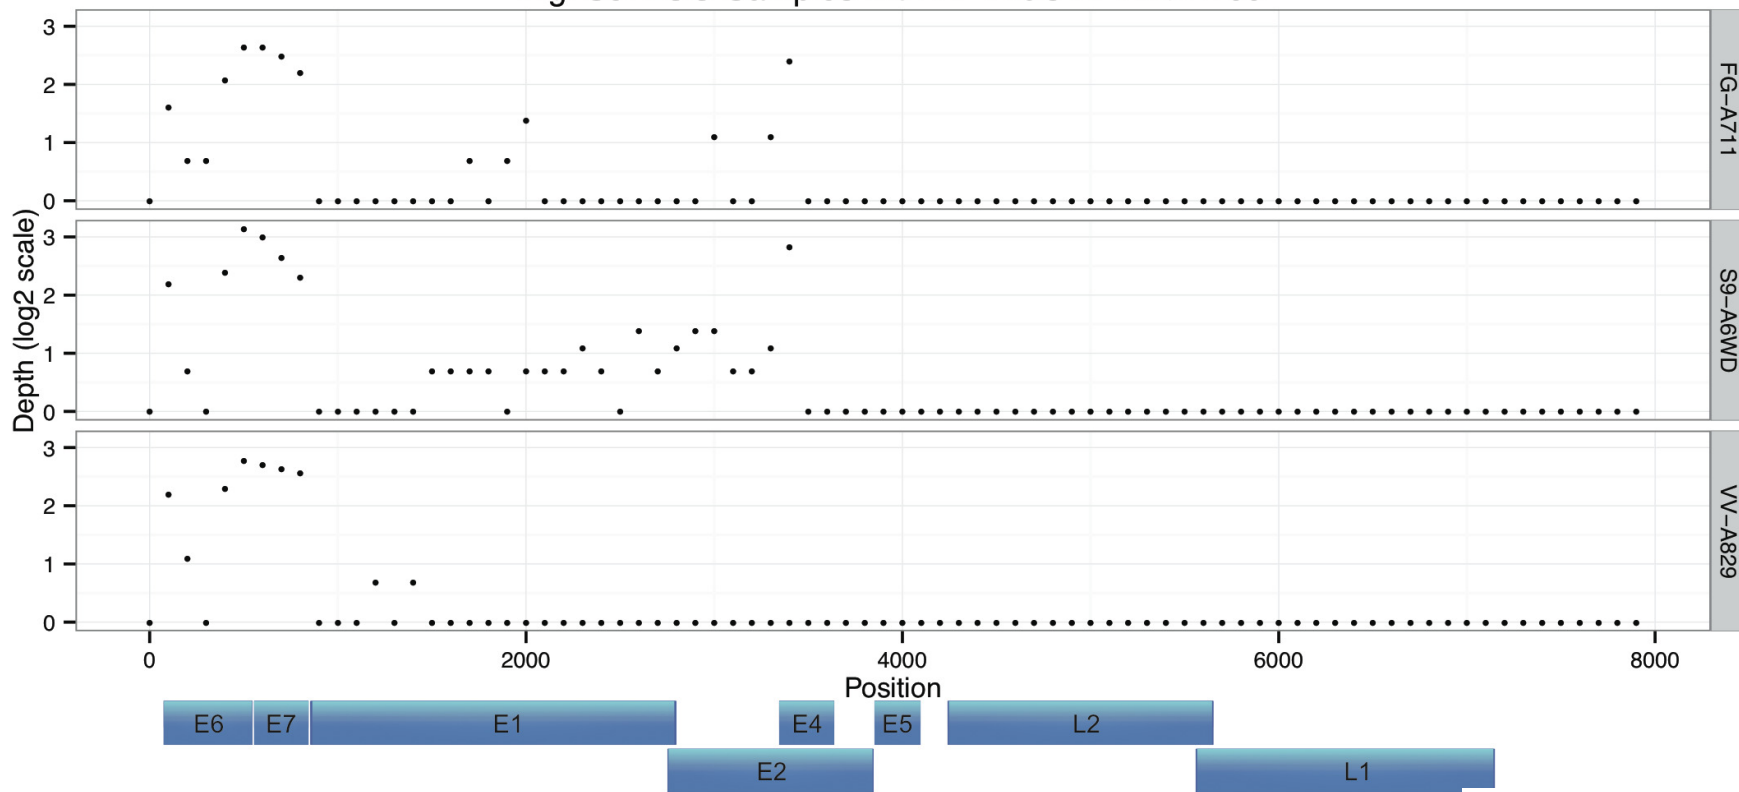

Fig. S10

### MYC Normalized RSEM Across CESC Samples with Different Viral Integration Profiles

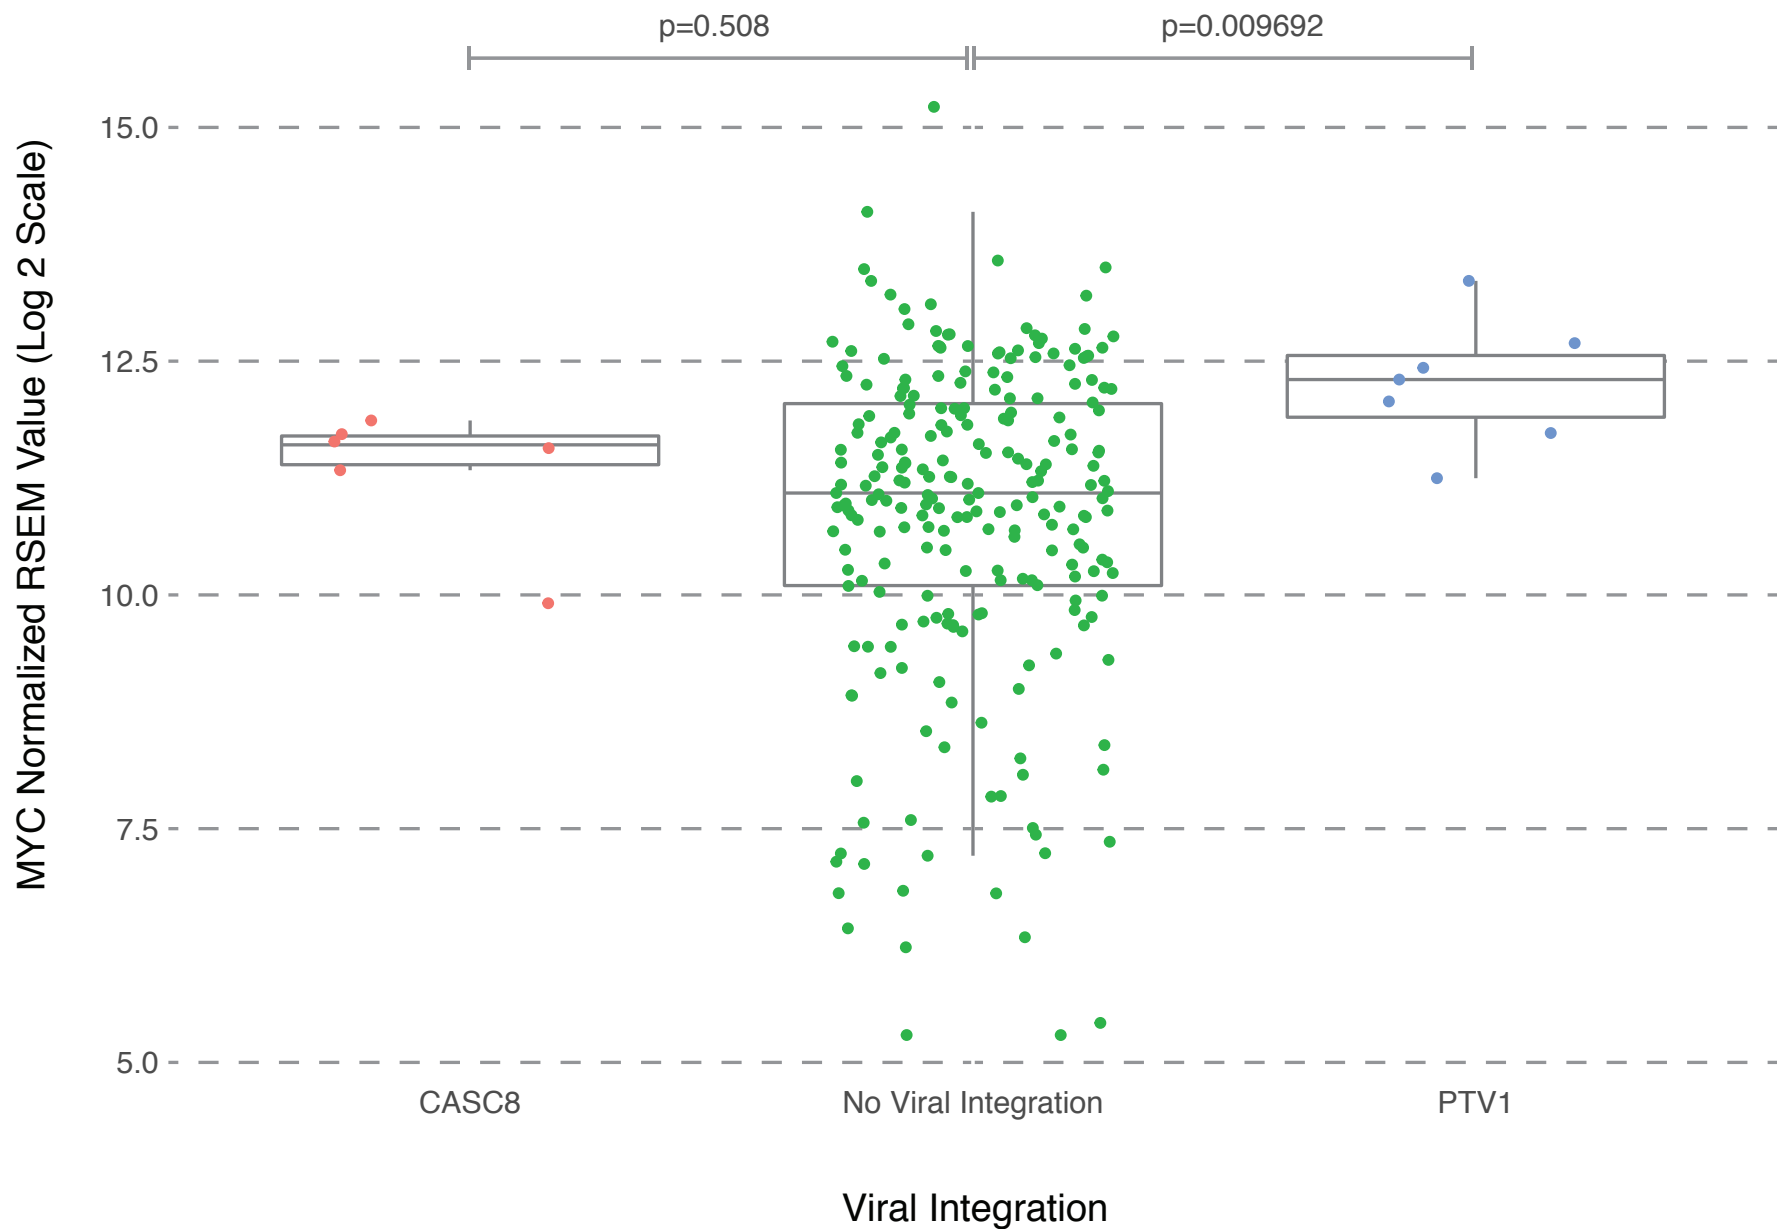





Fig. S11b

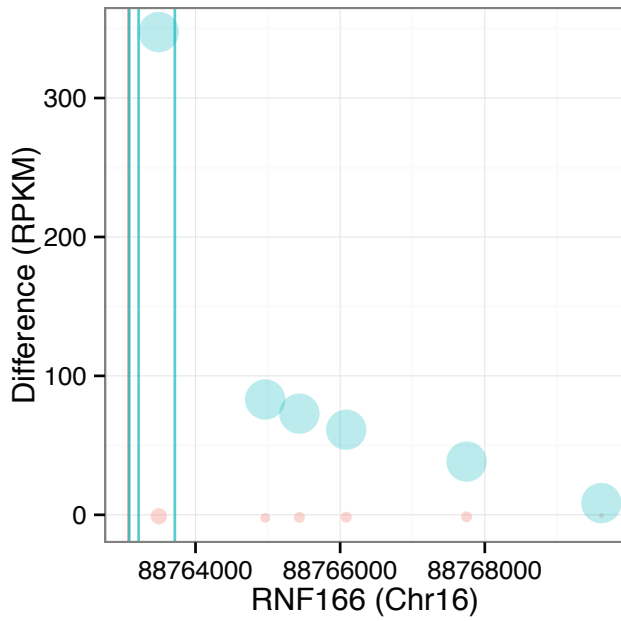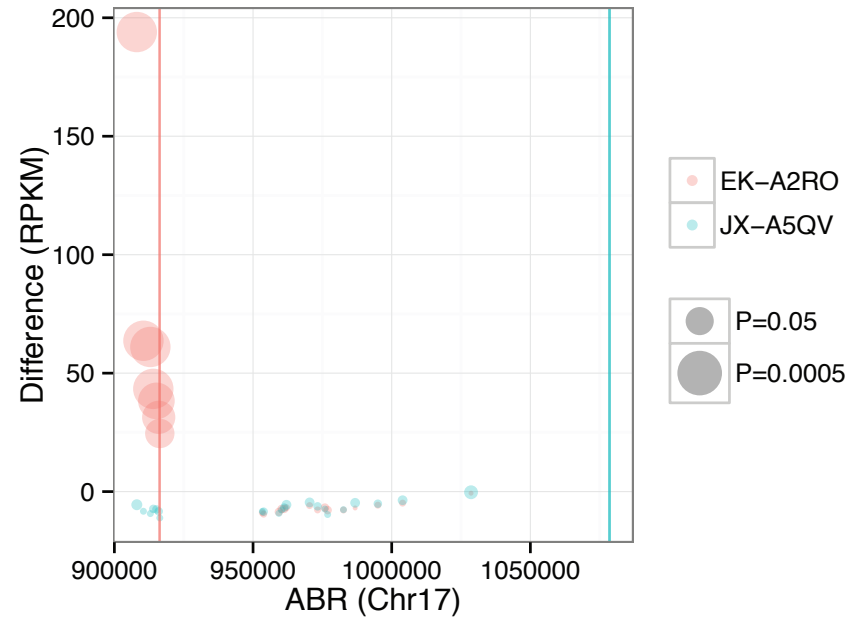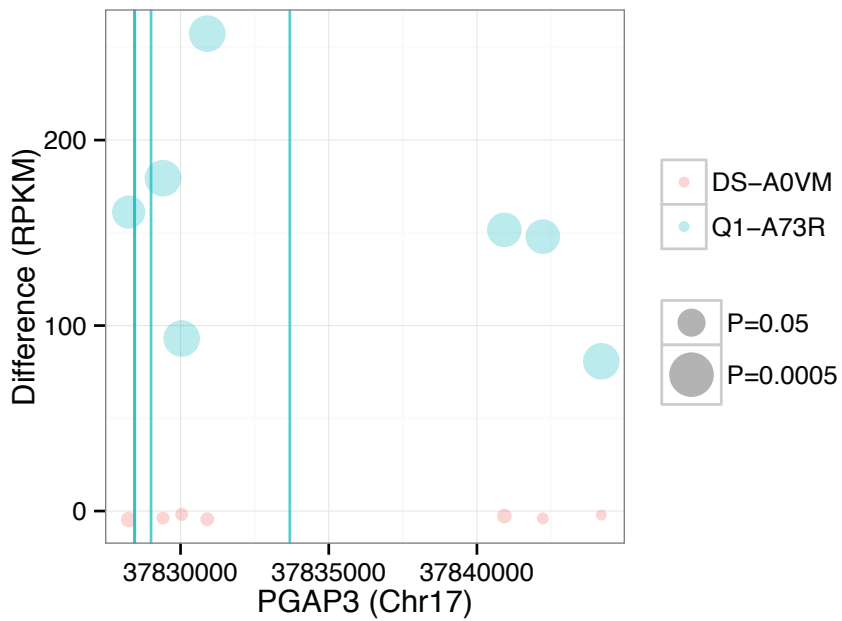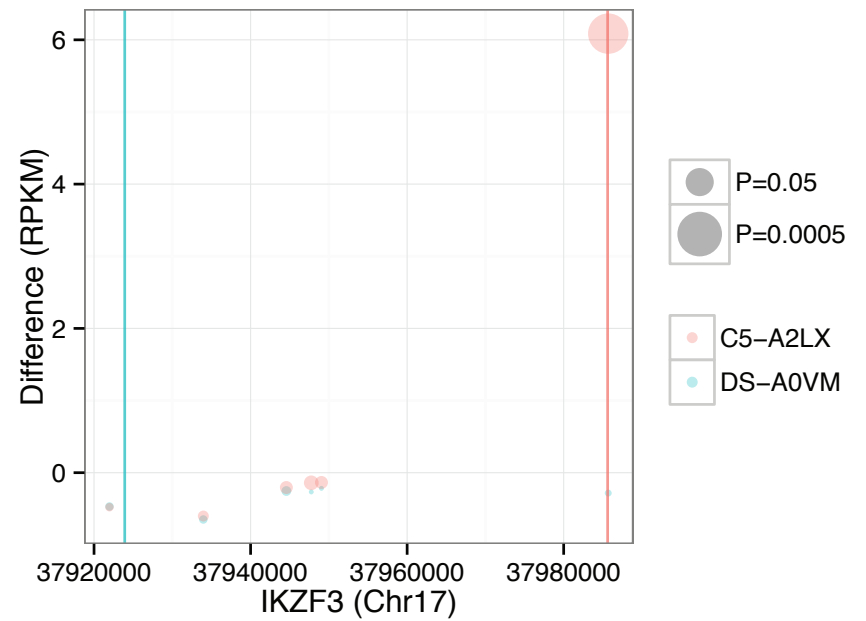

Fig. S12a

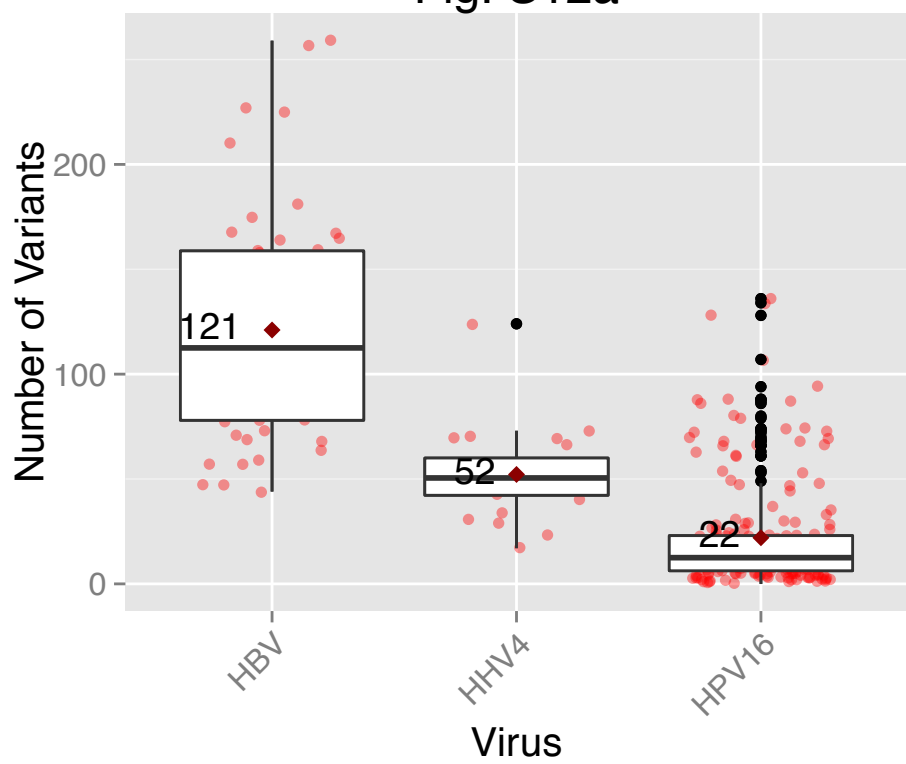

Fig. S12b

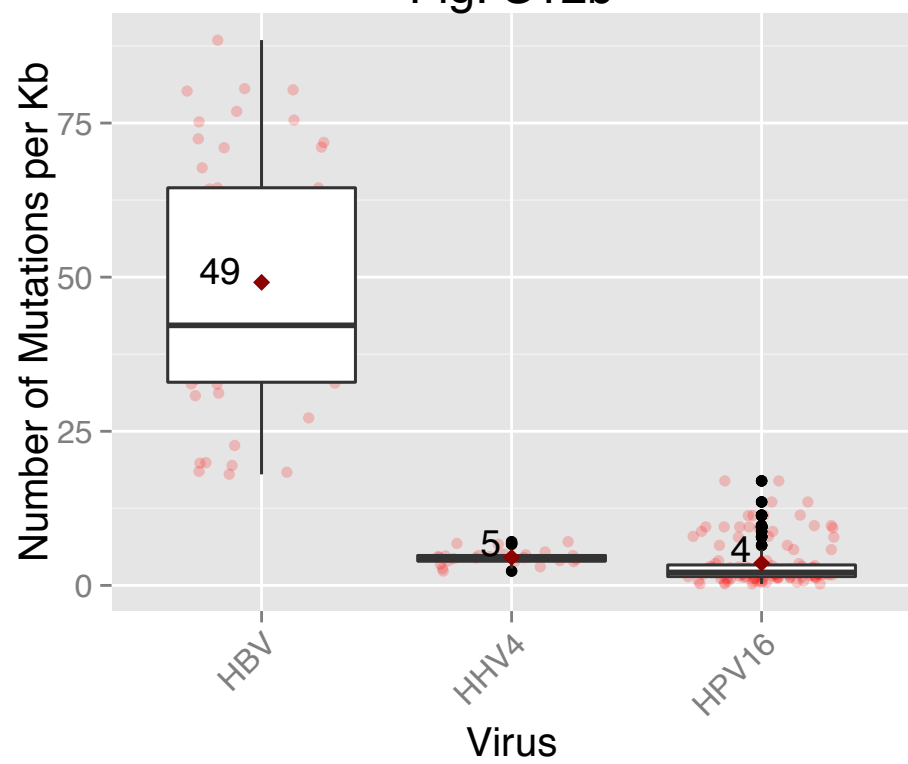

Fig. S13

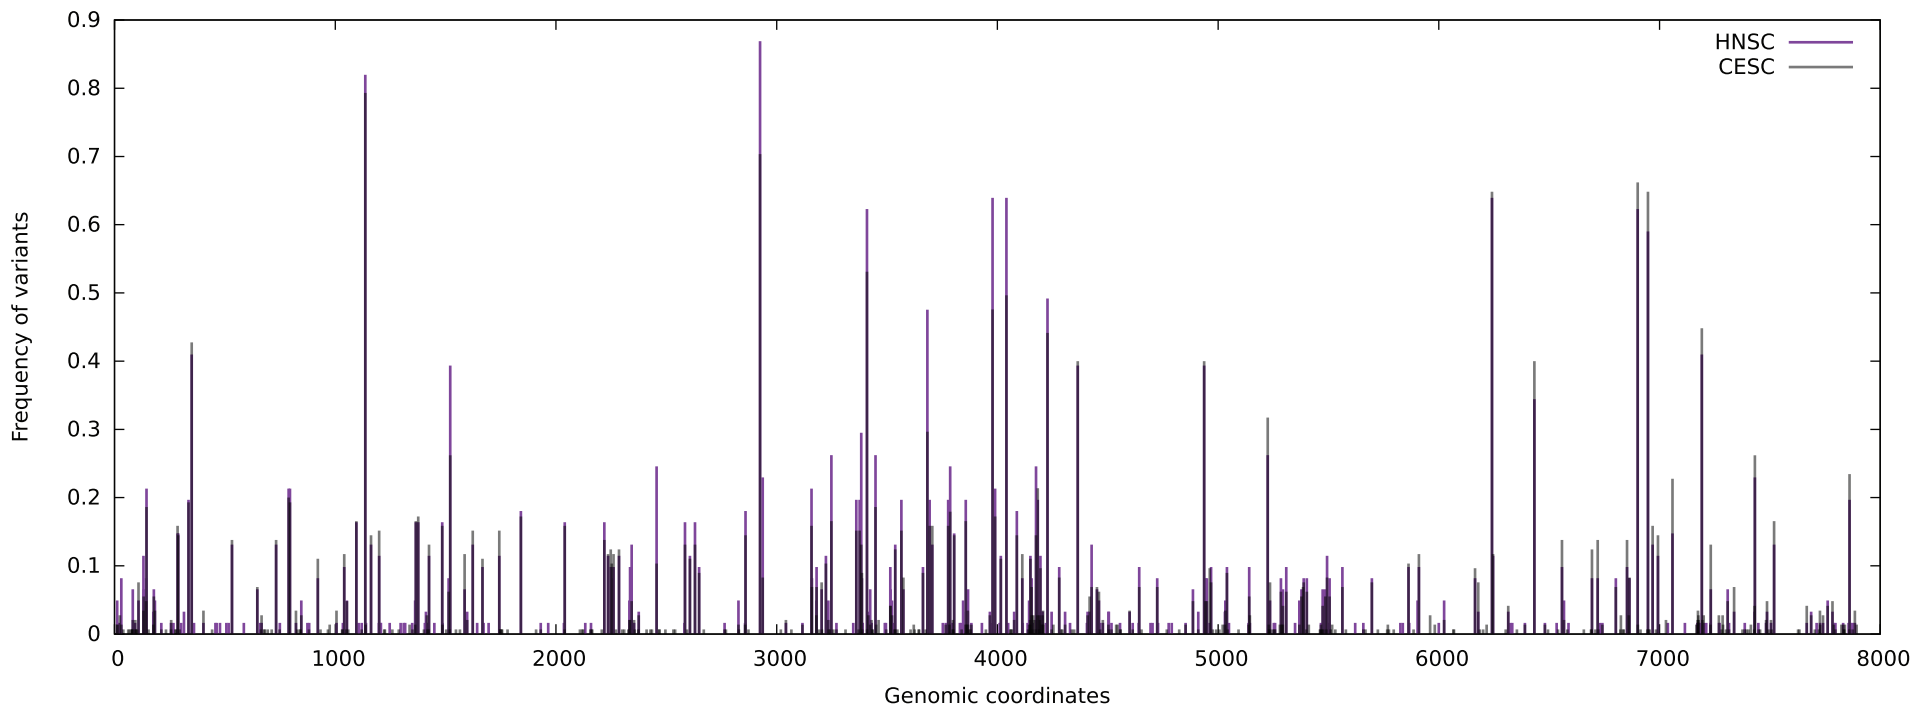

Figure S14a: HNSC

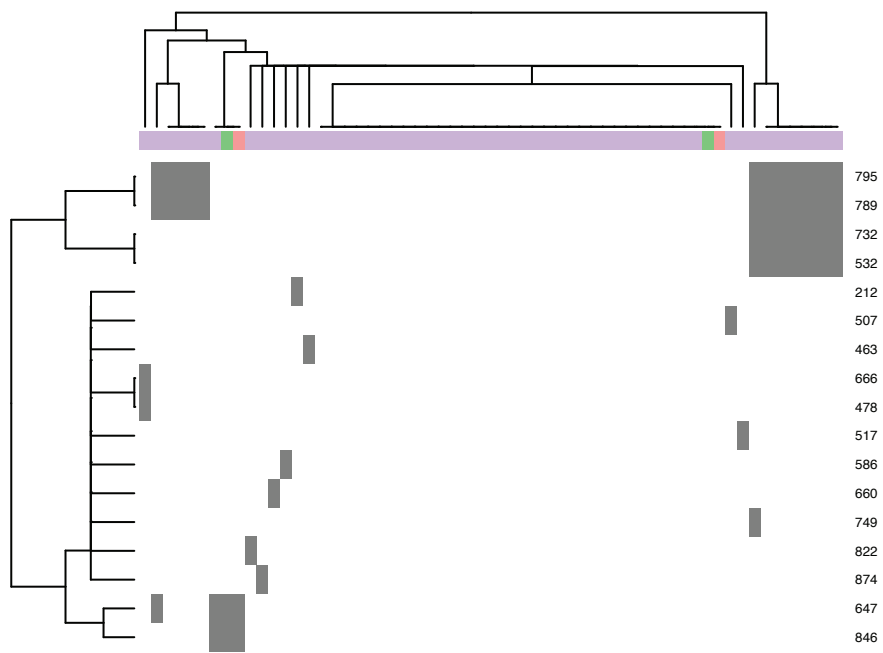

Figure S14b: CESC

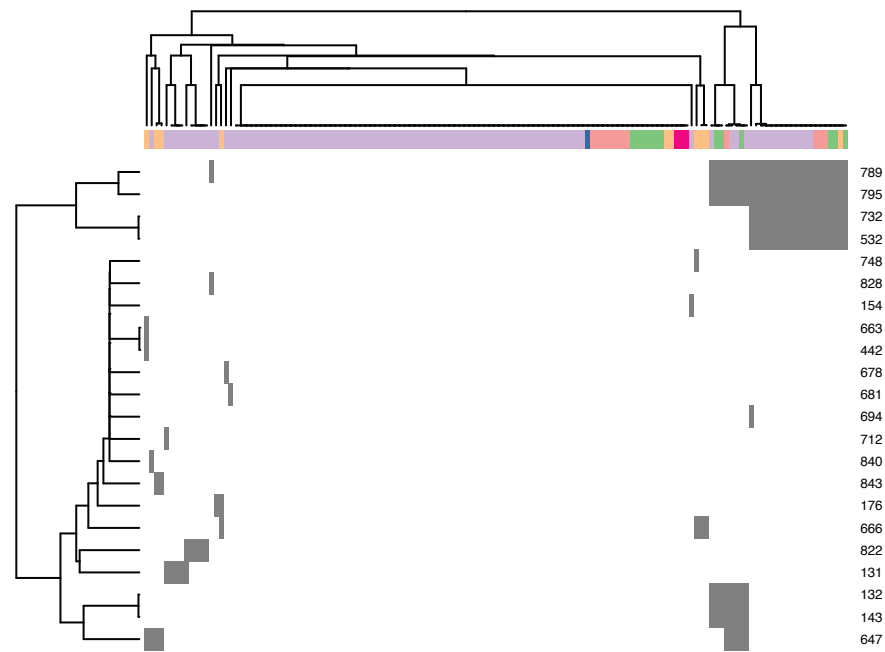

AMERICAN INDIAN OR ALASKA NATIVE  
ASIAN  
BLACK OR AFRICAN AMERICAN

NA  
NATIVE HAWAIIAN OR OTHER PACIFIC ISLANDER  
WHITE

Table S1: Abbreviations used in the study

**a) Abbreviations for 23 cancer types used in the study**

| <b>Cancer Types</b>                                              | <b>Abbreviations</b> |
|------------------------------------------------------------------|----------------------|
| Esophageal cancer                                                | ESCA                 |
| Stomach adenocarcinoma                                           | STAD                 |
| Colon adenocarcinoma                                             | COAD                 |
| Rectal adenocarcinoma                                            | READ                 |
| Liver hepatocellular carcinoma                                   | LIHC                 |
| Pancreatic adenocarcinoma                                        | PAAD                 |
| Kidney chromophobe                                               | KICH                 |
| Kidney renal clear cell carcinoma                                | KIRC                 |
| Kidney renal papillary cell carcinoma                            | KIRP                 |
| Bladder urothelial carcinoma                                     | BLCA                 |
| Prostate adenocarcinoma                                          | PRAD                 |
| Uterine carcinosarcoma                                           | UCS                  |
| Cervical squamous cell carcinoma and endocervical adenocarcinoma | CESC                 |
| Head/neck squamous cell carcinoma                                | HNSC                 |
| Lung squamous cell carcinoma                                     | LUSC                 |
| Lung adenocarcinoma                                              | LUAD                 |
| Thyroid carcinoma                                                | THCA                 |
| Diffuse large B-cell lymphoma                                    | DLBC                 |
| Acute myeloid leukemia                                           | LAML                 |
| Sarcoma                                                          | SARC                 |
| Skin cutaneous melanoma                                          | SKCM                 |
| Glioblastoma multiforme                                          | GBM                  |
| Brain low grade glioma                                           | LGG                  |

**b) Abbreviations for viruses used in the study**

| <b>Viruses</b>                  | <b>Abbreviations</b> |
|---------------------------------|----------------------|
| Human papillomavirus            | HPV                  |
| Human hepatitis B and C         | HBV and HCV          |
| Human T-cell lymphotropic virus | HTYV                 |
| Human herpesvirus               | HHV                  |
| Kaposi's sarcoma virus          | HHV8                 |
| Merkel cell polyomavirus        | MCV                  |
| Human immunodeficiency virus-1  | HIV-1                |
| Epstein-Barr virus              | EBV or HHV4          |
| BK polyomavirus                 | BKV                  |
| JC polyomavirus                 | JCV                  |

**c) Abbreviations for human genes used in the study**

| <b>Genes</b>                                               | <b>Abbreviations</b> |
|------------------------------------------------------------|----------------------|
| Grainyhead-Like Transcription Factor 2                     | <i>GPHL2</i>         |
| RAD51 Paralog B                                            | <i>RAD51B</i>        |
| Cancer Susceptibility Candidate 8                          | <i>CASC8</i>         |
| Cancer Susceptibility Candidate 11                         | <i>CASC11</i>        |
| Post-glycosylphosphatidylinositol attachment to proteins 3 | <i>PGAP3</i>         |
| Human epidermal growth factor receptor 2                   | <i>HER2 or ERBB2</i> |
| IKAROS Family Zinc Finger 3                                | <i>IKZF3</i>         |
| Protein Tyrosine Phosphatase, Non-Receptor Type 13         | <i>PTPN13</i>        |
| Mixed-lineage leukemia 4                                   | <i>MLL4 or KMT2B</i> |
| Myelocytomatosis oncogene cellular homolog                 | <i>MYC</i>           |
| Telomerase Reverse Transcriptase                           | <i>TERT</i>          |

**d) Abbreviations for viral genes used in the study**

| <b>Genes</b>                           | <b>Abbreviations</b> |
|----------------------------------------|----------------------|
| Epstein-Barr virus (EBV)-encoded RNA 1 | <i>EBER1</i>         |

Table S2: The locations of the common integration sites. In column 13, "e" stands for exon and "i" stands for intron.

| Sample                       | Cancer | Virus Type | Start | End  | Anchor's strand | Virus Gene | Chr | Start     | End       | Mate's strand | Host gene | Location    | Number of sporting reads pairs |
|------------------------------|--------|------------|-------|------|-----------------|------------|-----|-----------|-----------|---------------|-----------|-------------|--------------------------------|
| TCGA-FU-A3YQ-01A-11R-A22U-07 | CESC   | HPV16      | 4795  | 5843 | -               | L1;L2      | 1   | 206317539 | 206318587 | +             | CTSE      | e1;e2;i1;i2 | 18                             |
| TCGA-FU-A3YQ-01A-11R-A22U-07 | CESC   | HPV16      | 662   | 1758 | +               | E1;E7      | 1   | 206317941 | 206318989 | +             | CTSE      | e2;i1;i2    | 850                            |
| TCGA-FU-A3YQ-01A-11R-A22U-07 | CESC   | HPV16      | 66    | 1162 | +               | E1;E6;E7   | 1   | 206317941 | 206318989 | +             | CTSE      | e2;i1;i2    | 754                            |
| TCGA-VS-A8QA-01A-11R-A37O-07 | CESC   | HPV16      | 241   | 1337 | +               | E1;E6;E7   | 1   | 206318579 | 206319627 | +             | CTSE      | e3;i2;i3    | 26                             |
| TCGA-FU-A3YQ-01A-11R-A22U-07 | CESC   | HPV16      | 662   | 1758 | +               | E1;E7      | 1   | 206318676 | 206319724 | +             | CTSE      | e3;i2;i3    | 1798                           |
| TCGA-FU-A3YQ-01A-11R-A22U-07 | CESC   | HPV16      | 662   | 1758 | +               | E1;E7      | 1   | 206318678 | 206319726 | +             | CTSE      | e3;i2;i3    | 803                            |
| TCGA-FU-A3YQ-01A-11R-A22U-07 | CESC   | HPV16      | 66    | 1162 | +               | E1;E6;E7   | 1   | 206318678 | 206319726 | +             | CTSE      | e3;i2;i3    | 87                             |
| TCGA-FU-A3YQ-01A-11R-A22U-07 | CESC   | HPV16      | 1967  | 3063 | +               | E1;E2      | 1   | 206318678 | 206319726 | +             | CTSE      | e3;i2;i3    | 33                             |
| TCGA-FU-A3YQ-01A-11R-A22U-07 | CESC   | HPV16      | 662   | 1758 | +               | E1;E7      | 1   | 206319756 | 206320804 | +             | CTSE      | e4;i3;i4    | 150                            |
| TCGA-FU-A3YQ-01A-11R-A22U-07 | CESC   | HPV16      | 66    | 1162 | +               | E1;E6;E7   | 1   | 206319756 | 206320804 | +             | CTSE      | e4;i3;i4    | 32                             |
| TCGA-FU-A3YQ-01A-11R-A22U-07 | CESC   | HPV16      | 662   | 1758 | +               | E1;E7      | 1   | 206324783 | 206325831 | +             | CTSE      | e5;i4;i5    | 45                             |
| TCGA-EA-A44S-01A-12R-A26T-07 | CESC   | HPV16      | 241   | 1337 | +               | E1;E6;E7   | 13  | 73987135  | 73988183  | +             | LINC00393 | 3'          | 92                             |
| TCGA-Q1-A5R3-01A-11R-A28H-07 | CESC   | HPV18      | 1     | 689  | +               | E6;E7      | 13  | 73987136  | 73988184  | +             | LINC00393 | 3'          | 16                             |
| TCGA-Q1-A5R3-01A-11R-A28H-07 | CESC   | HPV18      | 293   | 1389 | +               | E1;E6;E7   | 13  | 73987136  | 73988184  | +             | LINC00393 | 3'          | 2429                           |
| TCGA-C5-A8YR-01A-12R-A37O-07 | CESC   | HPV45      | 1     | 618  | +               | E6;E7      | 13  | 73987137  | 73988185  | +             | LINC00393 | 3'          | 232                            |
| TCGA-C5-A8YR-01A-12R-A37O-07 | CESC   | HPV45      | 118   | 1214 | +               | E1;E6;E7   | 13  | 73987137  | 73988185  | +             | LINC00393 | 3'          | 1532                           |
| TCGA-C5-A8YR-01A-12R-A37O-07 | CESC   | HPV45      | 714   | 1810 | +               | E1;E7      | 13  | 73987137  | 73988185  | +             | LINC00393 | 3'          | 5191                           |
| TCGA-JX-A3PZ-01A-11R-A32Y-07 | CESC   | HPV45      | 2936  | 4032 | +               | E2;E4;E5   | 13  | 73987435  | 73988483  | +             | LINC00393 | 3'          | 1360                           |
| TCGA-JX-A3PZ-01A-11R-A32Y-07 | CESC   | HPV45      | 290   | 1386 | +               | E1;E6;E7   | 13  | 73987435  | 73988483  | +             | LINC00393 | 3'          | 59                             |
| TCGA-JX-A3PZ-01A-11R-A32Y-07 | CESC   | HPV45      | 2936  | 4032 | +               | E2;E4;E5   | 13  | 73990121  | 73991169  | +             | LINC00393 | 3'          | 178                            |
| TCGA-JX-A3PZ-01A-11R-A32Y-07 | CESC   | HPV45      | 2936  | 4032 | +               | E2;E4;E5   | 13  | 73990177  | 73991225  | +             | LINC00393 | 3'          | 174                            |
| TCGA-C5-A8YR-01A-12R-A37O-07 | CESC   | HPV45      | 1610  | 2706 | +               | E1         | 13  | 73993882  | 73994930  | +             | LINC00393 | 3'          | 35                             |
| TCGA-EA-A44S-01A-12R-A26T-07 | CESC   | HPV16      | 241   | 1337 | +               | E1;E6;E7   | 13  | 74050705  | 74051753  | +             | LINC00393 | 3'          | 34                             |
| TCGA-EA-A44S-01A-12R-A26T-07 | CESC   | HPV16      | 1797  | 2893 | +               | E1;E2      | 13  | 74071218  | 74072266  | +             | LINC00393 | 3'          | 28                             |
| TCGA-C5-A1BL-01A-11R-A13Y-07 | CESC   | HPV16      | 407   | 1503 | +               | E1;E6;E7   | 13  | 74169189  | 74170237  | +             | LINC00393 | i1          | 14                             |
| TCGA-C5-A1BL-01A-11R-A13Y-07 | CESC   | HPV16      | 407   | 1503 | +               | E1;E6;E7   | 13  | 74177837  | 74178885  | +             | LINC00393 | i1          | 20                             |
| TCGA-C5-A1BL-01A-11R-A13Y-07 | CESC   | HPV16      | 2191  | 3239 | -               | E1;E2      | 13  | 74177841  | 74178889  | +             | LINC00393 | i1          | 63                             |
| TCGA-C5-A1BL-01A-11R-A13Y-07 | CESC   | HPV16      | 407   | 1503 | +               | E1;E6;E7   | 13  | 74187927  | 74188975  | +             | LINC00393 | i1          | 21                             |
| TCGA-C5-A1BL-01A-11R-A13Y-07 | CESC   | HPV16      | 1     | 681  | +               | E6;E7      | 13  | 74189683  | 74190731  | +             | LINC00393 | i1          | 111                            |
| TCGA-C5-A1BL-01A-11R-A13Y-07 | CESC   | HPV16      | 407   | 1503 | +               | E1;E6;E7   | 13  | 74189683  | 74190731  | +             | LINC00393 | i1          | 33                             |
| TCGA-C5-A1BL-01A-11R-A13Y-07 | CESC   | HPV16      | 407   | 1503 | +               | E1;E6;E7   | 13  | 74190249  | 74191297  | +             | LINC00393 | i1          | 272                            |
| TCGA-C5-A1BL-01A-11R-A13Y-07 | CESC   | HPV16      | 407   | 1503 | +               | E1;E6;E7   | 13  | 74190684  | 74191732  | +             | LINC00393 | i1          | 103                            |
| TCGA-C5-A1BL-01A-11R-A13Y-07 | CESC   | HPV16      | 407   | 1503 | +               | E1;E6;E7   | 13  | 74190859  | 74191907  | +             | LINC00393 | i1          | 42                             |
| TCGA-C5-A1BL-01A-11R-A13Y-07 | CESC   | HPV16      | 407   | 1503 | +               | E1;E6;E7   | 13  | 74196062  | 74197110  | +             | LINC00393 | i1          | 14                             |
| TCGA-C5-A1BL-01A-11R-A13Y-07 | CESC   | HPV16      | 407   | 1503 | +               | E1;E6;E7   | 13  | 74199271  | 74200319  | +             | LINC00393 | i1          | 11                             |
| TCGA-C5-A1BL-01A-11R-A13Y-07 | CESC   | HPV16      | 2992  | 4088 | +               | E2;E4;E5   | 13  | 74200591  | 74201639  | +             | LINC00393 | i1          | 71                             |



|                              |      |       |      |      |   |             |    |          |          |   |           |                     |       |
|------------------------------|------|-------|------|------|---|-------------|----|----------|----------|---|-----------|---------------------|-------|
| TCGA-C5-A1BL-01A-11R-A13Y-07 | CESC | HPV16 | 1    | 681  | + | E6;E7       | 13 | 74205394 | 74206442 | + | LINC00393 | i1                  | 109   |
| TCGA-C5-A1BL-01A-11R-A13Y-07 | CESC | HPV16 | 2992 | 4088 | + | E2;E4;E5    | 13 | 74205394 | 74206442 | + | LINC00393 | i1                  | 126   |
| TCGA-C5-A1BL-01A-11R-A13Y-07 | CESC | HPV16 | 3663 | 4759 | + | E2;E5;L2    | 13 | 74205394 | 74206442 | + | LINC00393 | i1                  | 16    |
| TCGA-C5-A1BL-01A-11R-A13Y-07 | CESC | HPV16 | 407  | 1503 | + | E1;E6;E7    | 13 | 74205394 | 74206442 | + | LINC00393 | i1                  | 124   |
| TCGA-C5-A1BL-01A-11R-A13Y-07 | CESC | HPV16 | 2191 | 3239 | - | E1;E2       | 13 | 74210342 | 74211390 | + | LINC00393 | i1                  | 20    |
| TCGA-C5-A1BL-01A-11R-A13Y-07 | CESC | HPV16 | 2191 | 3239 | - | E1;E2       | 13 | 74212649 | 74213697 | + | LINC00393 | i1                  | 465   |
| TCGA-MY-A5BD-01A-11R-A26T-07 | CESC | HPV16 | 3365 | 4461 | + | E2;E4;E5;L2 | 14 | 68616061 | 68617109 | - | RAD51B    | i7                  | 71    |
| TCGA-MY-A5BD-01A-11R-A26T-07 | CESC | HPV16 | 3370 | 4466 | + | E2;E4;E5;L2 | 14 | 68616471 | 68617519 | + | RAD51B    | i7                  | 382   |
| TCGA-EK-A2R8-01A-21R-A18M-07 | CESC | HPV45 | 3469 | 4517 | - | E2;E4;E5;L2 | 14 | 68644580 | 68645628 | + | RAD51B    | i7                  | 1162  |
| TCGA-EK-A2R8-01A-21R-A18M-07 | CESC | HPV45 | 3469 | 4517 | - | E2;E4;E5;L2 | 14 | 68645391 | 68646439 | + | RAD51B    | i7                  | 2259  |
| TCGA-EK-A2R8-01A-21R-A18M-07 | CESC | HPV45 | 1    | 618  | + | E6;E7       | 14 | 68645393 | 68646441 | + | RAD51B    | i7                  | 30    |
| TCGA-EK-A2R8-01A-21R-A18M-07 | CESC | HPV45 | 118  | 1214 | + | E1;E6;E7    | 14 | 68645393 | 68646441 | + | RAD51B    | i7                  | 287   |
| TCGA-EK-A2R8-01A-21R-A18M-07 | CESC | HPV45 | 714  | 1810 | + | E1;E7       | 14 | 68645393 | 68646441 | + | RAD51B    | i7                  | 1568  |
| TCGA-EK-A2R8-01A-21R-A18M-07 | CESC | HPV45 | 714  | 1810 | + | E1;E7       | 14 | 68650827 | 68651875 | + | RAD51B    | i7                  | 76    |
| TCGA-EK-A2R8-01A-21R-A18M-07 | CESC | HPV45 | 2028 | 3124 | + | E1;E2       | 14 | 68671205 | 68672253 | + | RAD51B    | i7                  | 1756  |
| TCGA-C5-A1BE-01B-11R-A13Y-07 | CESC | HPV16 | 1    | 684  | + | E6;E7       | 14 | 68800943 | 68801991 | + | RAD51B    | i8                  | 14    |
| TCGA-C5-A1BE-01B-11R-A13Y-07 | CESC | HPV16 | 241  | 1337 | + | E1;E6;E7    | 14 | 68800943 | 68801991 | + | RAD51B    | i8                  | 1317  |
| TCGA-EA-A78R-01A-11R-A32P-07 | CESC | HPV52 | 243  | 1339 | + | E1;E6;E7    | 14 | 68980578 | 68981626 | + | RAD51B    | i10                 | 79    |
| TCGA-4J-AA1J-01A-21R-A38B-07 | CESC | HPV18 | 305  | 1401 | + | E1;E6;E7    | 14 | 68982642 | 68983690 | + | RAD51B    | i10                 | 36    |
| TCGA-4J-AA1J-01A-21R-A38B-07 | CESC | HPV45 | 2219 | 3267 | - | E1;E2       | 14 | 68982650 | 68983698 | + | RAD51B    | i10                 | 952   |
| TCGA-4J-AA1J-01A-21R-A38B-07 | CESC | HPV18 | 2199 | 3247 | - | E1;E2       | 14 | 68982650 | 68983698 | + | RAD51B    | i10                 | 6480  |
| TCGA-EA-A78R-01A-11R-A32P-07 | CESC | HPV52 | 243  | 1339 | + | E1;E6;E7    | 14 | 69006774 | 69007822 | + | RAD51B    | i10                 | 44    |
| TCGA-EA-A78R-01A-11R-A32P-07 | CESC | HPV52 | 243  | 1339 | + | E1;E6;E7    | 14 | 69060779 | 69061827 | + | RAD51B    | e11;i10             | 13    |
| TCGA-EA-A50E-01A-21R-A26T-07 | CESC | HPV16 | 238  | 1334 | + | E1;E6;E7    | 14 | 69064376 | 69065424 | + | RAD51B    | 3'                  | 31    |
| TCGA-EA-A50E-01A-21R-A26T-07 | CESC | HPV16 | 238  | 1334 | + | E1;E6;E7    | 14 | 69065382 | 69066430 | + | RAD51B    | 3'                  | 265   |
| TCGA-ZJ-A8QQ-01A-11R-A37O-07 | CESC | HPV39 | 2347 | 3443 | + | E1;E2;E4    | 14 | 69148275 | 69149323 | + | RAD51B    | 3'                  | 18    |
| TCGA-EK-A2HO-01A-11R-A180-07 | CESC | HPV39 | 2347 | 3443 | + | E1;E2;E4    | 14 | 69148336 | 69149384 | + | RAD51B    | 3'                  | 84    |
| TCGA-EK-A2HO-01A-11R-A180-07 | CESC | HPV39 | 145  | 1241 | + | E1;E6;E7    | 14 | 69148336 | 69149384 | + | RAD51B    | 3'                  | 16    |
| TCGA-EK-A2HO-01A-11R-A180-07 | CESC | HPV39 | 145  | 1241 | + | E1;E6;E7    | 14 | 69149219 | 69150267 | + | RAD51B    | 3'                  | 67    |
| TCGA-ZJ-A8QQ-01A-11R-A37O-07 | CESC | HPV39 | 145  | 1241 | + | E1;E6;E7    | 14 | 69149416 | 69150464 | + | RAD51B    | 3'                  | 54    |
| TCGA-JW-A5VK-01A-11R-A28H-07 | CESC | HPV16 | 218  | 1314 | + | E1;E6;E7    | 16 | 88762551 | 88763599 | + | RNF166    | e6                  | 13    |
| TCGA-JX-A5QV-01A-22R-A28H-07 | CESC | HPV16 | 227  | 1323 | + | E1;E6;E7    | 16 | 88762551 | 88763599 | + | RNF166    | e6                  | 11    |
| TCGA-JW-A5VL-01A-11R-A28H-07 | CESC | HPV16 | 1    | 1049 | - | E1;E6;E7    | 16 | 88762560 | 88763608 | + | RNF166    | e6                  | 14    |
| TCGA-JW-A5VL-01A-11R-A28H-07 | CESC | HPV16 | 1    | 686  | + | E6;E7       | 16 | 88762689 | 88763737 | + | RNF166    | e6                  | 57    |
| TCGA-JW-A5VL-01A-11R-A28H-07 | CESC | HPV16 | 905  | 2001 | + | E1          | 16 | 88762689 | 88763737 | + | RNF166    | e6                  | 1475  |
| TCGA-JW-A5VL-01A-11R-A28H-07 | CESC | HPV16 | 244  | 1340 | + | E1;E6;E7    | 16 | 88762689 | 88763737 | + | RNF166    | e6                  | 20711 |
| TCGA-JW-A5VL-01A-11R-A28H-07 | CESC | HPV16 | 1    | 1049 | - | E1;E6;E7    | 16 | 88763190 | 88764238 | + | RNF166    | e6;i5               | 558   |
| TCGA-EK-A2RO-01A-11R-A18M-07 | CESC | HPV16 | 1    | 683  | + | E6;E7       | 17 | 915768   | 916816   | + | ABR       | e17;e18;i16;i17;i18 | 14    |

|                              |      |       |      |      |   |          |    |           |           |   |             |                         |      |
|------------------------------|------|-------|------|------|---|----------|----|-----------|-----------|---|-------------|-------------------------|------|
| TCGA-EK-A2RO-01A-11R-A18M-07 | CESC | HPV16 | 239  | 1335 | + | E1;E6;E7 | 17 | 915768    | 916816    | + | ABR         | e17;e18;i16;i17;i18     | 112  |
| TCGA-JX-A5QV-01A-22R-A28H-07 | CESC | HPV16 | 6045 | 7093 | - | L1       | 17 | 1078019   | 1079067   | + | ABR         | i1                      | 17   |
| TCGA-Q1-A73R-01A-11R-A33Z-07 | CESC | HPV16 | 5963 | 7011 | - | L1       | 17 | 37827920  | 37828968  | + | PGAP3       | e7                      | 1264 |
| TCGA-Q1-A73R-01A-11R-A33Z-07 | CESC | HPV16 | 7260 | 8356 | + | N/A      | 17 | 37827930  | 37828978  | + | PGAP3       | e7                      | 10   |
| TCGA-Q1-A73R-01A-11R-A33Z-07 | CESC | HPV16 | 7260 | 8356 | + | N/A      | 17 | 37828480  | 37829528  | + | PGAP3       | e6;e7;i5;i6             | 569  |
| TCGA-Q1-A73R-01A-11R-A33Z-07 | CESC | HPV16 | 5963 | 7011 | - | L1       | 17 | 37833163  | 37834211  | + | PGAP3       | i3                      | 23   |
| TCGA-DS-A0VM-01A-11R-A10U-07 | CESC | HPV16 | 1763 | 2859 | + | E1;E2    | 17 | 37850744  | 37851792  | + | ERBB2,PGAP3 | 5'                      | 11   |
| TCGA-LP-A5U3-01A-11R-A28H-07 | CESC | HPV16 | 242  | 1338 | + | E1;E6;E7 | 17 | 37855194  | 37856242  | + | ERBB2       | 5'                      | 17   |
| TCGA-DS-A7WF-01A-11R-A352-07 | CESC | HPV16 | 1    | 597  | + | E6;E7    | 17 | 37857850  | 37858898  | + | ERBB2       | 5'                      | 15   |
| TCGA-DS-A7WF-01A-11R-A352-07 | CESC | HPV16 | 6302 | 7350 | - | L1       | 17 | 37858203  | 37859251  | + | ERBB2       | 5'                      | 10   |
| TCGA-LP-A5U3-01A-11R-A28H-07 | CESC | HPV16 | 1    | 676  | + | E6;E7    | 17 | 37862784  | 37863832  | + | ERBB2       | e1                      | 13   |
| TCGA-LP-A5U3-01A-11R-A28H-07 | CESC | HPV16 | 242  | 1338 | + | E1;E6;E7 | 17 | 37862784  | 37863832  | + | ERBB2       | e1                      | 1513 |
| TCGA-DS-A0VM-01A-11R-A10U-07 | CESC | HPV16 | 2885 | 3933 | - | E2;E4;E5 | 17 | 37862804  | 37863852  | + | ERBB2       | e1                      | 15   |
| TCGA-LP-A5U3-01A-11R-A28H-07 | CESC | HPV16 | 242  | 1338 | + | E1;E6;E7 | 17 | 37864145  | 37865193  | + | ERBB2       | e1;i1                   | 381  |
| TCGA-LP-A5U3-01A-11R-A28H-07 | CESC | HPV16 | 242  | 1338 | + | E1;E6;E7 | 17 | 37865045  | 37866093  | + | ERBB2       | e2;e3;i1;i2             | 17   |
| TCGA-CS-A1M9-01A-11R-A13Y-07 | CESC | HPV16 | 246  | 1342 | + | E1;E6;E7 | 17 | 37872219  | 37873267  | + | ERBB2       | e10;i10                 | 81   |
| TCGA-CS-A1M9-01A-11R-A13Y-07 | CESC | HPV16 | 246  | 1342 | + | E1;E6;E7 | 17 | 37873097  | 37874145  | + | ERBB2       | e11;i10;i11             | 582  |
| TCGA-CS-A1M9-01A-11R-A13Y-07 | CESC | HPV16 | 3107 | 4203 | + | E2;E4;E5 | 17 | 37873716  | 37874764  | + | ERBB2       | e11;i11                 | 72   |
| TCGA-LP-A5U3-01A-11R-A28H-07 | CESC | HPV16 | 242  | 1338 | + | E1;E6;E7 | 17 | 37879625  | 37880673  | + | ERBB2       | e13;e14;e15;i13;i14;i15 | 314  |
| TCGA-LP-A5U3-01A-11R-A28H-07 | CESC | HPV16 | 242  | 1338 | + | E1;E6;E7 | 17 | 37880518  | 37881566  | + | ERBB2       | e16;e17;i15;i16         | 15   |
| TCGA-LP-A5U3-01A-11R-A28H-07 | CESC | HPV16 | 4845 | 5893 | - | L1;L2    | 17 | 37885869  | 37886917  | + | ERBB2       | 3'                      | 477  |
| TCGA-LP-A5U3-01A-11R-A28H-07 | CESC | HPV16 | 4864 | 5960 | + | L1;L2    | 17 | 37886130  | 37887178  | + | ERBB2       | 3'                      | 12   |
| TCGA-DS-A0VM-01A-11R-A10U-07 | CESC | HPV16 | 6507 | 7555 | - | L1       | 17 | 37923397  | 37924445  | + | IKZF3       | i7                      | 44   |
| TCGA-CS-A2LX-01A-11R-A18M-07 | CESC | HPV16 | 280  | 1376 | + | E1;E6;E7 | 17 | 37985092  | 37986140  | + | IKZF3       | e3;i2;i3                | 14   |
| TCGA-EK-A2PK-01A-11R-A18M-07 | CESC | HPV18 | 289  | 1385 | + | E1;E6;E7 | 4  | 87535611  | 87536659  | + | PTPN13      | i1                      | 28   |
| TCGA-EK-A2PK-01A-11R-A18M-07 | CESC | HPV18 | 2956 | 4052 | + | E2;E4;E5 | 4  | 87535611  | 87536659  | + | PTPN13      | i1                      | 518  |
| TCGA-WL-A834-01A-11R-A352-07 | CESC | HPV16 | 2853 | 3901 | - | E2;E4;E5 | 4  | 87555884  | 87556932  | + | PTPN13      | e2;i1;i2                | 24   |
| TCGA-WL-A834-01A-11R-A352-07 | CESC | HPV16 | 1    | 1049 | - | E1;E6;E7 | 4  | 87555884  | 87556932  | + | PTPN13      | e2;i1;i2                | 44   |
| TCGA-VS-A8QC-01A-11R-A37O-07 | CESC | HPV16 | 241  | 1337 | + | E1;E6;E7 | 4  | 87655384  | 87656432  | + | PTPN13      | e13;e14;i12;i13;i14     | 450  |
| TCGA-VS-A8QC-01A-11R-A37O-07 | CESC | HPV16 | 1    | 1049 | - | E1;E6;E7 | 4  | 87656077  | 87657125  | + | PTPN13      | e15;i14;i15             | 28   |
| TCGA-VS-A8QC-01A-11R-A37O-07 | CESC | HPV16 | 241  | 1337 | + | E1;E6;E7 | 4  | 87656239  | 87657287  | + | PTPN13      | e15;i14;i15             | 11   |
| TCGA-JX-A5QV-01A-22R-A28H-07 | CESC | HPV16 | 6624 | 7672 | - | L1       | 8  | 102571740 | 102572788 | + | GRHL2       | i4                      | 10   |
| TCGA-IR-A3L7-01A-21R-A213-07 | CESC | HPV18 | 118  | 1214 | + | E1;E6;E7 | 8  | 102622681 | 102623729 | + | GRHL2       | i8                      | 509  |
| TCGA-IR-A3L7-01A-21R-A213-07 | CESC | HPV18 | 714  | 1810 | + | E1;E7    | 8  | 102622681 | 102623729 | + | GRHL2       | i8                      | 3407 |
| TCGA-IR-A3L7-01A-21R-A213-07 | CESC | HPV18 | 714  | 1810 | + | E1;E7    | 8  | 102623615 | 102624663 | + | GRHL2       | i8                      | 18   |
| TCGA-IR-A3L7-01A-21R-A213-07 | CESC | HPV18 | 118  | 1214 | + | E1;E6;E7 | 8  | 102624751 | 102625799 | + | GRHL2       | i8                      | 13   |
| TCGA-IR-A3L7-01A-21R-A213-07 | CESC | HPV18 | 714  | 1810 | + | E1;E7    | 8  | 102624751 | 102625799 | + | GRHL2       | i8                      | 128  |
| TCGA-IR-A3L7-01A-21R-A213-07 | CESC | HPV18 | 1558 | 2654 | + | E1       | 8  | 102627378 | 102628426 | + | GRHL2       | i8                      | 119  |

|                              |      |       |      |      |   |             |   |           |           |   |       |          |      |
|------------------------------|------|-------|------|------|---|-------------|---|-----------|-----------|---|-------|----------|------|
| TCGA-EK-A2IP-01A-11R-A180-07 | CESC | HPV45 | 622  | 1718 | + | E1;E7       | 8 | 128301664 | 128302712 | + | CASC8 | e6;i5    | 161  |
| TCGA-EK-A2IP-01A-11R-A180-07 | CESC | HPV45 | 15   | 1111 | + | E1;E6;E7    | 8 | 128301664 | 128302712 | + | CASC8 | e6;i5    | 19   |
| TCGA-FU-A23L-01A-11R-A16R-07 | CESC | HPV45 | 1    | 618  | + | E6;E7       | 8 | 128301669 | 128302717 | + | CASC8 | e6;i5    | 77   |
| TCGA-FU-A23L-01A-11R-A16R-07 | CESC | HPV45 | 118  | 1214 | + | E1;E6;E7    | 8 | 128301669 | 128302717 | + | CASC8 | e6;i5    | 796  |
| TCGA-FU-A23L-01A-11R-A16R-07 | CESC | HPV45 | 714  | 1810 | + | E1;E7       | 8 | 128301669 | 128302717 | + | CASC8 | e6;i5    | 4225 |
| TCGA-FU-A23K-01A-11R-A16R-07 | CESC | HPV18 | 1    | 688  | + | E6;E7       | 8 | 128301916 | 128302964 | + | CASC8 | e6;i5    | 145  |
| TCGA-FU-A23K-01A-11R-A16R-07 | CESC | HPV18 | 784  | 1880 | + | E1;E7       | 8 | 128301916 | 128302964 | + | CASC8 | e6;i5    | 3201 |
| TCGA-FU-A23K-01A-11R-A16R-07 | CESC | HPV18 | 188  | 1284 | + | E1;E6;E7    | 8 | 128301916 | 128302964 | + | CASC8 | e6;i5    | 568  |
| TCGA-FU-A40J-01A-11R-A24H-07 | CESC | HPV16 | 1    | 687  | + | E6;E7       | 8 | 128302059 | 128303107 | + | CASC8 | e6;i5    | 732  |
| TCGA-FU-A40J-01A-11R-A24H-07 | CESC | HPV16 | 244  | 1340 | + | E1;E6;E7    | 8 | 128302059 | 128303107 | + | CASC8 | e6;i5    | 2277 |
| TCGA-FU-A40J-01A-11R-A24H-07 | CESC | HPV16 | 244  | 1340 | + | E1;E6;E7    | 8 | 128305255 | 128306303 | + | CASC8 | i5       | 10   |
| TCGA-FU-A40J-01A-11R-A24H-07 | CESC | HPV16 | 244  | 1340 | + | E1;E6;E7    | 8 | 128305374 | 128306422 | + | CASC8 | i5       | 33   |
| TCGA-FU-A40J-01A-11R-A24H-07 | CESC | HPV16 | 244  | 1340 | + | E1;E6;E7    | 8 | 128307148 | 128308196 | + | CASC8 | i5       | 26   |
| TCGA-FU-A40J-01A-11R-A24H-07 | CESC | HPV16 | 1733 | 2829 | + | E1;E2       | 8 | 128310072 | 128311120 | + | CASC8 | i5       | 11   |
| TCGA-FU-A23L-01A-11R-A16R-07 | CESC | HPV45 | 118  | 1214 | + | E1;E6;E7    | 8 | 128311419 | 128312467 | + | CASC8 | i5       | 13   |
| TCGA-FU-A23L-01A-11R-A16R-07 | CESC | HPV45 | 714  | 1810 | + | E1;E7       | 8 | 128311419 | 128312467 | + | CASC8 | i5       | 122  |
| TCGA-FU-A40J-01A-11R-A24H-07 | CESC | HPV16 | 244  | 1340 | + | E1;E6;E7    | 8 | 128313224 | 128314272 | + | CASC8 | i5       | 15   |
| TCGA-FU-A23L-01A-11R-A16R-07 | CESC | HPV45 | 2576 | 3672 | + | E1;E2;E4    | 8 | 128319939 | 128320987 | + | CASC8 | i5       | 53   |
| TCGA-FU-A40J-01A-11R-A24H-07 | CESC | HPV16 | 1    | 687  | + | E6;E7       | 8 | 128334850 | 128335898 | + | CASC8 | i5       | 473  |
| TCGA-FU-A40J-01A-11R-A24H-07 | CESC | HPV16 | 244  | 1340 | + | E1;E6;E7    | 8 | 128334850 | 128335898 | + | CASC8 | i5       | 531  |
| TCGA-FU-A40J-01A-11R-A24H-07 | CESC | HPV16 | 1    | 1049 | - | E1;E6;E7    | 8 | 128334921 | 128335969 | + | CASC8 | i5       | 77   |
| TCGA-FU-A40J-01A-11R-A24H-07 | CESC | HPV16 | 1769 | 2817 | - | E1;E2       | 8 | 128334921 | 128335969 | + | CASC8 | i5       | 39   |
| TCGA-FU-A40J-01A-11R-A24H-07 | CESC | HPV16 | 1733 | 2829 | + | E1;E2       | 8 | 128337985 | 128339033 | + | CASC8 | i5       | 629  |
| TCGA-EK-A2H1-01A-11R-A180-07 | CESC | HPV16 | 3150 | 4246 | + | E2;E4;E5;L2 | 8 | 128400426 | 128401474 | + | CASC8 | i5       | 64   |
| TCGA-EK-A2H1-01A-11R-A180-07 | CESC | HPV16 | 3150 | 4246 | + | E2;E4;E5;L2 | 8 | 128403255 | 128404303 | + | CASC8 | i5       | 14   |
| TCGA-EK-A2H1-01A-11R-A180-07 | CESC | HPV16 | 600  | 1696 | + | E1;E7       | 8 | 128403255 | 128404303 | + | CASC8 | i5       | 24   |
| TCGA-EK-A2H1-01A-11R-A180-07 | CESC | HPV16 | 1    | 1085 | + | E1;E6;E7    | 8 | 128404390 | 128405438 | + | CASC8 | i5       | 89   |
| TCGA-EK-A2H1-01A-11R-A180-07 | CESC | HPV16 | 3150 | 4246 | + | E2;E4;E5;L2 | 8 | 128404390 | 128405438 | + | CASC8 | i5       | 69   |
| TCGA-EK-A2H1-01A-11R-A180-07 | CESC | HPV16 | 600  | 1696 | + | E1;E7       | 8 | 128404390 | 128405438 | + | CASC8 | i5       | 360  |
| TCGA-EK-A2H1-01A-11R-A180-07 | CESC | HPV16 | 3011 | 4059 | - | E2;E4;E5    | 8 | 128404825 | 128405873 | + | CASC8 | i5       | 84   |
| TCGA-UC-A7PF-01A-11R-A352-07 | CESC | HPV16 | 2960 | 4056 | + | E2;E4;E5    | 8 | 128432740 | 128433788 | + | CASC8 | e5;i4;i5 | 30   |
| TCGA-UC-A7PF-01A-11R-A352-07 | CESC | HPV16 | 239  | 1335 | + | E1;E6;E7    | 8 | 128432740 | 128433788 | + | CASC8 | e5;i4;i5 | 57   |
| TCGA-UC-A7PF-01A-11R-A352-07 | CESC | HPV16 | 2960 | 4056 | + | E2;E4;E5    | 8 | 128455327 | 128456375 | + | CASC8 | i4       | 29   |
| TCGA-UC-A7PF-01A-11R-A352-07 | CESC | HPV16 | 2960 | 4056 | + | E2;E4;E5    | 8 | 128469703 | 128470751 | + | CASC8 | i4       | 477  |
| TCGA-UC-A7PF-01A-11R-A352-07 | CESC | HPV16 | 239  | 1335 | + | E1;E6;E7    | 8 | 128469703 | 128470751 | + | CASC8 | i4       | 10   |
| TCGA-EA-A3HQ-01A-11R-A213-07 | CESC | HPV16 | 1    | 1049 | - | E1;E6;E7    | 8 | 128806339 | 128807387 | + | PVT1  | 5'       | 21   |
| TCGA-C5-A2M1-01A-11R-A18M-07 | CESC | HPV16 | 588  | 1684 | + | E1;E7       | 8 | 128806518 | 128807566 | + | PVT1  | 5'       | 18   |
| TCGA-C5-A2M1-01A-11R-A18M-07 | CESC | HPV16 | 3099 | 4195 | + | E2;E4;E5    | 8 | 128806518 | 128807566 | + | PVT1  | 5'       | 573  |

|                              |      |       |      |      |   |          |   |           |           |   |      |          |      |
|------------------------------|------|-------|------|------|---|----------|---|-----------|-----------|---|------|----------|------|
| TCGA-EA-A3HQ-01A-11R-A213-07 | CESC | HPV16 | 1    | 1049 | - | E1;E6;E7 | 8 | 128807651 | 128808699 | + | PVT1 | 5'       | 13   |
| TCGA-C5-A2M1-01A-11R-A18M-07 | CESC | HPV16 | 3099 | 4195 | + | E2;E4;E5 | 8 | 128807752 | 128808800 | + | PVT1 | 5'       | 80   |
| TCGA-LP-A7HU-01A-11R-A33Z-07 | CESC | HPV16 | 1    | 1048 | + | E1;E6;E7 | 8 | 128808641 | 128809689 | + | PVT1 | 5'       | 33   |
| TCGA-C5-A2M1-01A-11R-A18M-07 | CESC | HPV16 | 588  | 1684 | + | E1;E7    | 8 | 128863806 | 128864854 | + | PVT1 | 5'       | 26   |
| TCGA-C5-A2M1-01A-11R-A18M-07 | CESC | HPV16 | 3099 | 4195 | + | E2;E4;E5 | 8 | 128863806 | 128864854 | + | PVT1 | 5'       | 30   |
| TCGA-C5-A3HE-01A-21R-A22U-07 | CESC | HPV18 | 2383 | 3431 | - | E1;E2;E4 | 8 | 128865859 | 128866907 | + | PVT1 | 5'       | 20   |
| TCGA-C5-A2M1-01A-11R-A18M-07 | CESC | HPV16 | 588  | 1684 | + | E1;E7    | 8 | 128866924 | 128867972 | + | PVT1 | 5'       | 29   |
| TCGA-C5-A2M1-01A-11R-A18M-07 | CESC | HPV16 | 3099 | 4195 | + | E2;E4;E5 | 8 | 128866924 | 128867972 | + | PVT1 | 5'       | 12   |
| TCGA-C5-A2M1-01A-11R-A18M-07 | CESC | HPV16 | 3099 | 4195 | + | E2;E4;E5 | 8 | 128873074 | 128874122 | + | PVT1 | 5'       | 28   |
| TCGA-C5-A3HE-01A-21R-A22U-07 | CESC | HPV18 | 682  | 1778 | + | E1;E7    | 8 | 128889878 | 128890926 | + | PVT1 | 5'       | 15   |
| TCGA-C5-A3HE-01A-21R-A22U-07 | CESC | HPV18 | 86   | 1182 | + | E1;E6;E7 | 8 | 128889878 | 128890926 | + | PVT1 | 5'       | 30   |
| TCGA-C5-A2M1-01A-11R-A18M-07 | CESC | HPV16 | 588  | 1684 | + | E1;E7    | 8 | 128889887 | 128890935 | + | PVT1 | 5'       | 13   |
| TCGA-EA-A3HQ-01A-11R-A213-07 | CESC | HPV16 | 7260 | 8356 | + | N/A      | 8 | 128891915 | 128892963 | + | PVT1 | 5'       | 35   |
| TCGA-C5-A2M1-01A-11R-A18M-07 | CESC | HPV16 | 588  | 1684 | + | E1;E7    | 8 | 128902699 | 128903747 | + | PVT1 | e1;i1    | 158  |
| TCGA-C5-A2M1-01A-11R-A18M-07 | CESC | HPV16 | 1    | 1028 | + | E1;E6;E7 | 8 | 128902699 | 128903747 | + | PVT1 | e1;i1    | 12   |
| TCGA-C5-A2M1-01A-11R-A18M-07 | CESC | HPV16 | 3099 | 4195 | + | E2;E4;E5 | 8 | 128902699 | 128903747 | + | PVT1 | e1;i1    | 93   |
| TCGA-C5-A1MJ-01A-11R-A14Y-07 | CESC | HPV18 | 612  | 1660 | - | E1;E7    | 8 | 128977223 | 128978271 | + | PVT1 | i2       | 182  |
| TCGA-C5-A1MJ-01A-11R-A14Y-07 | CESC | HPV18 | 1478 | 2574 | + | E1       | 8 | 128977805 | 128978853 | + | PVT1 | i2       | 235  |
| TCGA-C5-A1M9-01A-11R-A13Y-07 | CESC | HPV16 | 4752 | 5800 | - | L1;L2    | 8 | 128989030 | 128990078 | + | PVT1 | i2       | 14   |
| TCGA-C5-A1M9-01A-11R-A13Y-07 | CESC | HPV16 | 3880 | 4928 | - | E5;L2    | 8 | 128992750 | 128993798 | + | PVT1 | i2       | 77   |
| TCGA-C5-A1M9-01A-11R-A13Y-07 | CESC | HPV16 | 2480 | 3576 | + | E1;E2;E4 | 8 | 128992939 | 128993987 | + | PVT1 | i2       | 21   |
| TCGA-C5-A1M9-01A-11R-A13Y-07 | CESC | HPV16 | 239  | 1335 | + | E1;E6;E7 | 8 | 128994095 | 128995143 | - | PVT1 | i2       | 49   |
| TCGA-C5-A1M9-01A-11R-A13Y-07 | CESC | HPV16 | 1    | 685  | + | E6;E7    | 8 | 128994230 | 128995278 | + | PVT1 | i2       | 155  |
| TCGA-C5-A1M9-01A-11R-A13Y-07 | CESC | HPV16 | 207  | 1303 | + | E1;E6;E7 | 8 | 128994230 | 128995278 | + | PVT1 | i2       | 1418 |
| TCGA-C5-A1M9-01A-11R-A13Y-07 | CESC | HPV16 | 2480 | 3576 | + | E1;E2;E4 | 8 | 128994230 | 128995278 | + | PVT1 | i2       | 441  |
| TCGA-C5-A1M9-01A-11R-A13Y-07 | CESC | HPV16 | 803  | 1899 | + | E1;E7    | 8 | 128994230 | 128995278 | + | PVT1 | i2       | 359  |
| TCGA-C5-A1M9-01A-11R-A13Y-07 | CESC | HPV16 | 239  | 1335 | + | E1;E6;E7 | 8 | 128995642 | 128996690 | - | PVT1 | e3;i2;i3 | 27   |
| TCGA-C5-A1M9-01A-11R-A13Y-07 | CESC | HPV16 | 1    | 1049 | - | E1;E6;E7 | 8 | 128995808 | 128996856 | + | PVT1 | e3;i2;i3 | 21   |
| TCGA-C5-A1M9-01A-11R-A13Y-07 | CESC | HPV16 | 1    | 685  | + | E6;E7    | 8 | 128996037 | 128997085 | + | PVT1 | e3;i2;i3 | 117  |
| TCGA-C5-A1M9-01A-11R-A13Y-07 | CESC | HPV16 | 207  | 1303 | + | E1;E6;E7 | 8 | 128996037 | 128997085 | + | PVT1 | e3;i2;i3 | 529  |
| TCGA-C5-A1M9-01A-11R-A13Y-07 | CESC | HPV16 | 803  | 1899 | + | E1;E7    | 8 | 128996037 | 128997085 | + | PVT1 | e3;i2;i3 | 199  |
| TCGA-C5-A1M9-01A-11R-A13Y-07 | CESC | HPV16 | 1    | 1049 | - | E1;E6;E7 | 8 | 129000896 | 129001944 | + | PVT1 | e4;i3;i4 | 291  |
| TCGA-C5-A1M9-01A-11R-A13Y-07 | CESC | HPV16 | 4752 | 5800 | - | L1;L2    | 8 | 129000896 | 129001944 | + | PVT1 | e4;i3;i4 | 17   |
| TCGA-C5-A1M9-01A-11R-A13Y-07 | CESC | HPV16 | 1    | 685  | + | E6;E7    | 8 | 129001243 | 129002291 | + | PVT1 | e4;i3;i4 | 459  |
| TCGA-C5-A1M9-01A-11R-A13Y-07 | CESC | HPV16 | 207  | 1303 | + | E1;E6;E7 | 8 | 129001243 | 129002291 | + | PVT1 | e4;i3;i4 | 1964 |
| TCGA-C5-A1M9-01A-11R-A13Y-07 | CESC | HPV16 | 803  | 1899 | + | E1;E7    | 8 | 129001243 | 129002291 | + | PVT1 | e4;i3;i4 | 588  |
| TCGA-C5-A1M9-01A-11R-A13Y-07 | CESC | HPV16 | 1    | 1049 | - | E1;E6;E7 | 8 | 129004909 | 129005957 | + | PVT1 | i4       | 11   |
| TCGA-C5-A1M9-01A-11R-A13Y-07 | CESC | HPV16 | 1    | 685  | + | E6;E7    | 8 | 129006811 | 129007859 | + | PVT1 | i4       | 35   |

|                              |      |       |      |      |   |                |    |           |           |   |        |                   |     |
|------------------------------|------|-------|------|------|---|----------------|----|-----------|-----------|---|--------|-------------------|-----|
| TCGA-C5-A1M9-01A-11R-A13Y-07 | CESC | HPV16 | 207  | 1303 | + | E1;E6;E7       | 8  | 129006811 | 129007859 | + | PVT1   | i4                | 75  |
| TCGA-C5-A1M9-01A-11R-A13Y-07 | CESC | HPV16 | 803  | 1899 | + | E1;E7          | 8  | 129006811 | 129007859 | + | PVT1   | i4                | 40  |
| TCGA-C5-A1M9-01A-11R-A13Y-07 | CESC | HPV16 | 1    | 685  | + | E6;E7          | 8  | 129008846 | 129009894 | + | PVT1   | i4                | 52  |
| TCGA-C5-A1M9-01A-11R-A13Y-07 | CESC | HPV16 | 207  | 1303 | + | E1;E6;E7       | 8  | 129008846 | 129009894 | + | PVT1   | i4                | 155 |
| TCGA-C5-A1M9-01A-11R-A13Y-07 | CESC | HPV16 | 803  | 1899 | + | E1;E7          | 8  | 129008846 | 129009894 | + | PVT1   | i4                | 73  |
| TCGA-C5-A1M9-01A-11R-A13Y-07 | CESC | HPV16 | 1    | 1049 | - | E1;E6;E7       | 8  | 129009965 | 129011013 | + | PVT1   | i4                | 15  |
| TCGA-C5-A1M9-01A-11R-A13Y-07 | CESC | HPV16 | 1    | 1049 | - | E1;E6;E7       | 8  | 129013258 | 129014306 | + | PVT1   | i4                | 57  |
| TCGA-C5-A1M9-01A-11R-A13Y-07 | CESC | HPV16 | 6308 | 7356 | - | L1             | 8  | 129013258 | 129014306 | + | PVT1   | i4                | 145 |
| TCGA-C5-A1M9-01A-11R-A13Y-07 | CESC | HPV16 | 207  | 1303 | + | E1;E6;E7       | 8  | 129014350 | 129015398 | + | PVT1   | i4                | 12  |
| TCGA-C5-A1M9-01A-11R-A13Y-07 | CESC | HPV16 | 1    | 685  | + | E6;E7          | 8  | 129021317 | 129022365 | + | PVT1   | i4                | 10  |
| TCGA-C5-A1M9-01A-11R-A13Y-07 | CESC | HPV16 | 207  | 1303 | + | E1;E6;E7       | 8  | 129021317 | 129022365 | + | PVT1   | i4                | 10  |
| TCGA-C5-A1M9-01A-11R-A13Y-07 | CESC | HPV16 | 4752 | 5800 | - | L1;L2          | 8  | 129022050 | 129023098 | + | PVT1   | i4                | 27  |
| TCGA-C5-A1M9-01A-11R-A13Y-07 | CESC | HPV16 | 207  | 1303 | + | E1;E6;E7       | 8  | 129022425 | 129023473 | + | PVT1   | i4                | 23  |
| TCGA-BA-4077-01B-01R-1436-07 | HNSC | HPV16 | 279  | 1375 | + | E1;E6;E7       | 14 | 68699742  | 68700790  | + | RAD51B | i7                | 539 |
| TCGA-BA-4077-01B-01R-1436-07 | HNSC | HPV16 | 279  | 1375 | + | E1;E6;E7       | 14 | 68701191  | 68702239  | + | RAD51B | i7                | 590 |
| TCGA-BA-4077-01B-01R-1436-07 | HNSC | HPV16 | 1    | 685  | + | E6;E7          | 14 | 68703642  | 68704690  | + | RAD51B | i7                | 47  |
| TCGA-BA-4077-01B-01R-1436-07 | HNSC | HPV16 | 279  | 1375 | + | E1;E6;E7       | 14 | 68703642  | 68704690  | + | RAD51B | i7                | 831 |
| TCGA-BA-4077-01B-01R-1436-07 | HNSC | HPV16 | 279  | 1375 | + | E1;E6;E7       | 14 | 68706373  | 68707421  | + | RAD51B | i7                | 48  |
| TCGA-BA-4077-01B-01R-1436-07 | HNSC | HPV16 | 279  | 1375 | + | E1;E6;E7       | 14 | 68738593  | 68739641  | + | RAD51B | i7                | 15  |
| TCGA-BA-4077-01B-01R-1436-07 | HNSC | HPV16 | 279  | 1375 | + | E1;E6;E7       | 14 | 68741043  | 68742091  | + | RAD51B | i7                | 14  |
| TCGA-BA-4077-01B-01R-1436-07 | HNSC | HPV16 | 2932 | 3980 | - | E2;E4;E5       | 14 | 68741058  | 68742106  | + | RAD51B | i7                | 73  |
| TCGA-BA-4077-01B-01R-1436-07 | HNSC | HPV16 | 1    | 685  | + | E6;E7          | 14 | 68758058  | 68759106  | + | RAD51B | e8;i7;i8          | 33  |
| TCGA-BA-4077-01B-01R-1436-07 | HNSC | HPV16 | 279  | 1375 | + | E1;E6;E7       | 14 | 68758058  | 68759106  | + | RAD51B | e8;i7;i8          | 119 |
| TCGA-BA-4077-01B-01R-1436-07 | HNSC | HPV16 | 1    | 685  | + | E6;E7          | 14 | 68877658  | 68878706  | + | RAD51B | e9;i8;i9          | 39  |
| TCGA-BA-4077-01B-01R-1436-07 | HNSC | HPV16 | 279  | 1375 | + | E1;E6;E7       | 14 | 68877658  | 68878706  | + | RAD51B | e9;i8;i9          | 67  |
| TCGA-CN-A6V7-01A-12R-A34R-07 | HNSC | HPV16 | 2851 | 3947 | + | E2;E4;E5       | 14 | 68913189  | 68914237  | + | RAD51B | i9                | 228 |
| TCGA-CN-A6V7-01A-12R-A34R-07 | HNSC | HPV16 | 241  | 1337 | + | E1;E6;E7       | 14 | 68913189  | 68914237  | + | RAD51B | i9                | 29  |
| TCGA-CN-A6V7-01A-12R-A34R-07 | HNSC | HPV16 | 2851 | 3947 | + | E2;E4;E5       | 14 | 68914063  | 68915111  | + | RAD51B | i9                | 41  |
| TCGA-BA-4077-01B-01R-1436-07 | HNSC | HPV16 | 1    | 685  | + | E6;E7          | 14 | 68963654  | 68964702  | + | RAD51B | i10               | 10  |
| TCGA-BA-4077-01B-01R-1436-07 | HNSC | HPV16 | 279  | 1375 | + | E1;E6;E7       | 14 | 68963654  | 68964702  | + | RAD51B | i10               | 17  |
| TCGA-T2-A6X0-01A-11R-A34R-07 | HNSC | HPV16 | 238  | 1334 | + | E1;E6;E7       | 9  | 5449916   | 5450964   | + | CD274  | e1;i1             | 56  |
| TCGA-CV-5443-01A-01R-1514-07 | HNSC | HPV16 | 6255 | 7303 | - | L1             | 9  | 5464248   | 5465296   | + | CD274  | i4                | 17  |
| TCGA-DD-A119-01A-11R-A131-07 | LIHC | HBV   | 1363 | 2413 | - | C;Polymerase;X | 19 | 36212079  | 36213129  | + | KMT2B  | e3;i3             | 30  |
| TCGA-DD-A3A3-01A-11R-A22L-07 | LIHC | HBV   | 1    | 1049 | - | Polymerase;S   | 19 | 36212341  | 36213389  | + | KMT2B  | e3;e4;i3;i4       | 58  |
| TCGA-UB-A7ME-01A-11R-A33J-07 | LIHC | HBV   | 1154 | 2250 | + | C;Polymerase;X | 19 | 36212883  | 36213931  | + | KMT2B  | e4;e5;e6;i3;i4;i5 | 10  |
| TCGA-CC-A9FS-01A-11R-A37K-07 | LIHC | HBV   | 1    | 1049 | - | Polymerase;S   | 19 | 36212974  | 36214022  | + | KMT2B  | e4;e5;e6;i3;i4;i5 | 11  |
| TCGA-DD-A116-01A-11R-A131-07 | LIHC | HBV   | 1    | 1051 | - | Polymerase;S   | 19 | 36213523  | 36214573  | + | KMT2B  | e5;e6;e7;i5;i6;i7 | 17  |
| TCGA-ED-A8O6-01A-11R-A36F-07 | LIHC | HBV   | 180  | 1228 | - | Polymerase;S   | 19 | 36213760  | 36214808  | + | KMT2B  | e6;e7;e8;i5;i6;i7 | 23  |

|                              |      |     |      |      |   |                |    |          |          |   |       |                   |    |
|------------------------------|------|-----|------|------|---|----------------|----|----------|----------|---|-------|-------------------|----|
| TCGA-CC-A9FS-01A-11R-A37K-07 | LIHC | HBV | 1167 | 2263 | + | C;Polymerase;X | 19 | 36213808 | 36214856 | + | KMT2B | e6;e7;e8;i5;i6;i7 | 25 |
| TCGA-CC-5258-01A-01R-A131-07 | LIHC | HBV | 1178 | 2278 | + | C;Polymerase;X | 19 | 36214156 | 36215206 | + | KMT2B | e6;e7;e8;i6;i7;i8 | 16 |
| TCGA-CC-5258-01A-01R-A131-07 | LIHC | HBV | 1178 | 2278 | + | C;Polymerase;X | 19 | 36214260 | 36215310 | + | KMT2B | e7;e8;i6;i7;i8    | 40 |
| TCGA-CC-A3MB-01A-11R-A213-07 | LIHC | HBV | 1098 | 2194 | + | C;Polymerase;X | 5  | 1270683  | 1271731  | + | TERT  | e8;i7;i8          | 26 |
| TCGA-CC-A3MB-01A-11R-A213-07 | LIHC | HBV | 130  | 1226 | + | Polymerase;S   | 5  | 1272251  | 1273299  | + | TERT  | e7;i6;i7          | 14 |
| TCGA-CC-A3MB-01A-11R-A213-07 | LIHC | HBV | 1098 | 2194 | + | C;Polymerase;X | 5  | 1272251  | 1273299  | + | TERT  | e7;i6;i7          | 31 |
| TCGA-CC-A3MB-01A-11R-A213-07 | LIHC | HBV | 1098 | 2194 | + | C;Polymerase;X | 5  | 1273201  | 1274249  | + | TERT  | i6                | 45 |
| TCGA-CC-A3MB-01A-11R-A213-07 | LIHC | HBV | 1794 | 2890 | + | C;X            | 5  | 1273247  | 1274295  | + | TERT  | i6                | 10 |
| TCGA-CC-A3MB-01A-11R-A213-07 | LIHC | HBV | 1098 | 2194 | + | C;Polymerase;X | 5  | 1273247  | 1274295  | + | TERT  | i6                | 65 |
| TCGA-G3-A25U-01A-11R-A16W-07 | LIHC | HBV | 1    | 1049 | - | Polymerase;S   | 5  | 1294138  | 1295186  | + | TERT  | e1;e2;j1          | 21 |
